# Supplementary material for: The regulatory role of alternative splicing in inflammatory bowel disease
Source: Front Immunol. 2023 Apr 21;14:1095267. doi: 10.3389/fimmu.2023.1095267 (PMC10160418; doi:10.3389/fimmu.2023.1095267)
Supplement: Supplementary Table 1 — Bibliometric analysis of the studies on alternative splicing and inflammatory bowel disease (IBD) (including Crohn’s disease (CD) and ulcerative colitis (UC)) based on the web of science core collection database. A. Histogram with Alternative splicing, IBD (including CD and UC) as keywords for the last decade (2012-2021), based on the Web of Science core collection database. Approximately 6-19 articles have been published in this category each year for the last decade. B. Heatmap of bibliometric analysis, the number of documents with “INFLAMMATORY-BOWEL-DISEASE” “ULCERATIVE-COLITIS” “CROHNS-DISEASE” “EXPRESSION” “ACTIVATION” “GENOME-WIDE ASSOCIATION” “PATHOGENESIS” “MECHANISMS” “SPLICE VARIANT” “SPLICE-SITE MUTATION” as the keywords in the Web of Science core collection database. Color saturation indicates the strength of citation keyword. C. Network diagram for bibliometric analysis of alternative splicing in studies of IBD (including CD and UC) based on the Web of Science core collection database. Nodes represent unique keywords; node size is proportional to the number of references; node colors indicate modules. Some keywords are related together, such as Ulcerative colitis, splicing variant and colorectal cancer, while the remaining keywords are related in other three parts. Note: NF kappa B, nuclear factor- kappa B; ER stress, endoplasmic reticulum stress. [file Table_1.xls]

## Sheet: savedrecs
Supplementary Table 1 Bibliometric analysis of the studies on alternative splicing and inflammatory bowel disease (IBD) (including Crohn’s disease (CD) and ulcerative colitis (UC)) based on the web of science core collection database
Authors	Author Full Names	Article Title	Source Title	ISSN	eISSN	Publication Date	Publication Year	Volume	Issue	Article Number	DOI	DOI Link	Pubmed Id	UT (Unique WOS ID)	Web of Science Record
Berger, K; Somineni, H; Prince, J; Kugathasan, S; Gibson, G	Berger, Kiera; Somineni, Hari; Prince, Jarod; Kugathasan, Subra; Gibson, Greg	Altered splicing associated with the pathology of inflammatory bowel disease	HUMAN GENOMICS	1473-9542	1479-7364	JUL 23	2021	15	1	47	10.1186/s40246-021-00347-y	http://dx.doi.org/10.1186/s40246-021-00347-y	34301333	WOS:000679329700001	View Full Record in Web of Science
Hasler, R; Sheibani-Tezerji, R; Sinha, A; Barann, M; Rehman, A; Esser, D; Aden, K; Knecht, C; Brandt, B; Nikolaus, S; Schauble, S; Kaleta, C; Franke, A; Fretter, C; Muller, W; Hutt, MT; Krawczak, M; Schreiber, S; Rosenstiel, P	Haesler, Robert; Sheibani-Tezerji, Raheleh; Sinha, Anupam; Barann, Matthias; Rehman, Ateequr; Esser, Daniela; Aden, Konrad; Knecht, Carolin; Brandt, Berenice; Nikolaus, Susanna; Schaeuble, Sascha; Kaleta, Christoph; Franke, Andre; Fretter, Christoph; Mueller, Werner; Huett, Marc-Thorsten; Krawczak, Michael; Schreiber, Stefan; Rosenstiel, Philip	Uncoupling of mucosal gene regulation, mRNA splicing and adherent microbiota signatures in inflammatory bowel disease	GUT	0017-5749	1468-3288	DEC	2017	66	12		10.1136/gutjnl-2016-311651	http://dx.doi.org/10.1136/gutjnl-2016-311651	27694142	WOS:000416769400012	View Full Record in Web of Science
Moran, CJ; Walters, TD; Guo, CH; Kugathasan, S; Klein, C; Turner, D; Wolters, VM; Bandsma, RH; Mouzaki, M; Zachos, M; Langer, JC; Cutz, E; Benseler, SM; Roifman, CM; Silverberg, MS; Griffiths, AM; Snapper, SB; Muise, AM	Moran, Christopher J.; Walters, Thomas D.; Guo, Cong-Hui; Kugathasan, Subra; Klein, Christoph; Turner, Dan; Wolters, Victorien M.; Bandsma, Robert H.; Mouzaki, Marialena; Zachos, Mary; Langer, Jacob C.; Cutz, Ernest; Benseler, Susanne M.; Roifman, Chaim M.; Silverberg, Mark S.; Griffiths, Anne M.; Snapper, Scott B.; Muise, Aleixo M.	IL-10R Polymorphisms Are Associated with Very-early-onset Ulcerative Colitis	INFLAMMATORY BOWEL DISEASES	1078-0998		JAN	2013	19	1		10.1002/ibd.22974	http://dx.doi.org/10.1002/ibd.22974	22550014	WOS:000316397200023	View Full Record in Web of Science
Derer, S; Brethack, AK; Pietsch, C; Jendrek, ST; Nitzsche, T; Bokemeyer, A; Hov, JR; Schaffler, H; Bettenworth, D; Grassl, GA; Sina, C	Derer, Stefanie; Brethack, Ann-Kathrin; Pietsch, Carlotta; Jendrek, Sebastian T.; Nitzsche, Thomas; Bokemeyer, Arne; Hov, Johannes R.; Schaeffler, Holger; Bettenworth, Dominik; Grassl, Guntram A.; Sina, Christian	Inflammatory Bowel Disease-associated GP2 Autoantibodies Inhibit Mucosal Immune Response to Adherent-invasive Bacteria	INFLAMMATORY BOWEL DISEASES	1078-0998	1536-4844	DEC	2020	26	12		10.1093/ibd/izaa069	http://dx.doi.org/10.1093/ibd/izaa069	32304568	WOS:000595481100013	View Full Record in Web of Science
Li, DW; Tan, Y	Li, Daowei; Tan, Yue	Dysregulation of alternative splicing is associated with the pathogenesis of ulcerative colitis	BIOMEDICAL ENGINEERING ONLINE		1475-925X	NOV 27	2021	20	1	121	10.1186/s12938-021-00959-4	http://dx.doi.org/10.1186/s12938-021-00959-4	34838026	WOS:000722995800004	View Full Record in Web of Science
Maragkoudaki, M; Vaiopoulou, A; Theodoropoulos, GE; Legaki, E; Sechi, LA; Karamanolis, G; Zografos, G; Gazouli, M	Maragkoudaki, Maria; Vaiopoulou, Anna; Theodoropoulos, George E.; Legaki, Evangelia; Sechi, Leonardo A.; Karamanolis, George; Zografos, George; Gazouli, Maria	Specific detection of OCT4 isoforms in inflammatory bowel disease	GUT PATHOGENS	1757-4749		OCT 1	2015	7		25	10.1186/s13099-015-0073-1	http://dx.doi.org/10.1186/s13099-015-0073-1	26435752	WOS:000362063600001	View Full Record in Web of Science
Jacenik, D; Cygankiewicz, AI; Mokrowiecka, A; Malecka-Panas, E; Fichna, J; Krajewska, WM	Jacenik, Damian; Cygankiewicz, Adam I.; Mokrowiecka, Anna; Malecka-Panas, Ewa; Fichna, Jakub; Krajewska, Wanda M.	Sex- and Age-Related Estrogen Signaling Alteration in Inflammatory Bowel Diseases: Modulatory Role of Estrogen Receptors	INTERNATIONAL JOURNAL OF MOLECULAR SCIENCES	1422-0067		JUL 1	2019	20	13	3175	10.3390/ijms20133175	http://dx.doi.org/10.3390/ijms20133175	31261736	WOS:000477041100063	View Full Record in Web of Science
Negroni, A; Prete, E; Vitali, R; Cesi, V; Aloi, M; Civitelli, F; Cucchiara, S; Stronati, L	Negroni, Anna; Prete, Enrica; Vitali, Roberta; Cesi, Vincenzo; Aloi, Marina; Civitelli, Fortunata; Cucchiara, Salvatore; Stronati, Laura	Endoplasmic reticulum stress and unfolded protein response are involved in paediatric inflammatory bowel disease	DIGESTIVE AND LIVER DISEASE	1590-8658	1878-3562	SEP	2014	46	9		10.1016/j.dld.2014.05.013	http://dx.doi.org/10.1016/j.dld.2014.05.013	24953208	WOS:000341154000006	View Full Record in Web of Science
Oh, SH; Baek, J; Liany, H; Foo, JN; Kim, KM; Yang, SCO; Liu, JJ; Song, K	Oh, Seak Hee; Baek, Jiwon; Liany, Herty; Foo, Jia Nee; Kim, Kyung Mo; Yang, Stephen Chang-Oh; Liu, Jianjun; Song, Kyuyoung	A Synonymous Variant in IL10RA Affects RNA Splicing in Paediatric Patients with Refractory Inflammatory Bowel Disease	JOURNAL OF CROHNS & COLITIS	1873-9946	1876-4479	NOV	2016	10	11		10.1093/ecco-jcc/jjw102	http://dx.doi.org/10.1093/ecco-jcc/jjw102	27177777	WOS:000387990000015	View Full Record in Web of Science
Bootz, F; Schmid, AS; Neri, D	Bootz, Franziska; Schmid, Anja Sophie; Neri, Dario	Alternatively Spliced EDA Domain of Fibronectin Is a Target for Pharmacodelivery Applications in Inflammatory Bowel Disease	INFLAMMATORY BOWEL DISEASES	1078-0998	1536-4844	AUG	2015	21	8		10.1097/MIB.0000000000000440	http://dx.doi.org/10.1097/MIB.0000000000000440	25993691	WOS:000359190700022	View Full Record in Web of Science
Low, END; Mokhtar, NM; Wong, ZQ; Ali, RAR	Low, Eden Ngah Den; Mokhtar, Norfilza Mohd; Wong, Zhiqin; Ali, Raja Affendi Raja	Colonic Mucosal Transcriptomic Changes in Patients with Long-Duration Ulcerative Colitis Revealed Colitis-Associated Cancer Pathways	JOURNAL OF CROHNS & COLITIS	1873-9946	1876-4479	JUN	2019	13	6		10.1093/ecco-jcc/jjz002	http://dx.doi.org/10.1093/ecco-jcc/jjz002	30954025	WOS:000469781200009	View Full Record in Web of Science
Li, N; Wang, XM; Jiang, LJ; Zhang, M; Li, N; Wei, ZZ; Zheng, N; Zhao, YJ	Li, Nan; Wang, Xue-Ming; Jiang, Li-Jun; Zhang, Meng; Li, Na; Wei, Zhen-Zhen; Zheng, Nan; Zhao, Ya-Jiao	Effects of endoplasmic reticulum stress on the expression of inflammatory cytokines in patients with ulcerative colitis	WORLD JOURNAL OF GASTROENTEROLOGY	1007-9327	2219-2840	FEB 21	2016	22	7		10.3748/wjg.v22.i7.2357	http://dx.doi.org/10.3748/wjg.v22.i7.2357	26900298	WOS:000371792500018	View Full Record in Web of Science
Takeuchi, I; Kawai, T; Nambu, M; Migita, O; Yoshimura, S; Nishimura, K; Yoshioka, T; Ogura, M; Kyodo, R; Shimizu, H; Ito, S; Kato, M; Onodera, M; Hata, K; Matsubara, Y; Arai, K	Takeuchi, Ichiro; Kawai, Toshinao; Nambu, Meika; Migita, Ohsuke; Yoshimura, Satoshi; Nishimura, Kenichi; Yoshioka, Takako; Ogura, Masao; Kyodo, Reiko; Shimizu, Hirotaka; Ito, Shuichi; Kato, Motohiro; Onodera, Masafumi; Hata, Kenichiro; Matsubara, Yoichi; Arai, Katsuhiro	X-linked inhibitor of apoptosis protein deficiency complicated with Crohn's disease-like enterocolitis and Takayasu arteritis: A case report	CLINICAL IMMUNOLOGY	1521-6616	1521-7035	AUG	2020	217		108495	10.1016/j.clim.2020.108495	http://dx.doi.org/10.1016/j.clim.2020.108495	32540394	WOS:000548738300020	View Full Record in Web of Science
Tacconi, C; Schwager, S; Cousin, N; Bajic, D; Sesartic, M; Sundberg, JP; Neri, D; Detmar, M	Tacconi, Carlotta; Schwager, Simon; Cousin, Nikola; Bajic, Davor; Sesartic, Marko; Sundberg, John P.; Neri, Dario; Detmar, Michael	Antibody-Mediated Delivery of VEGFC Ameliorates Experimental Chronic Colitis	ACS PHARMACOLOGY & TRANSLATIONAL SCIENCE		2575-9108	OCT 11	2019	2	5		10.1021/acsptsci.9b00037	http://dx.doi.org/10.1021/acsptsci.9b00037	32259068	WOS:000616375500006	View Full Record in Web of Science
Ji, SG; Juran, BD; Mucha, S; Folseraas, T; Jostins, L; Melum, E; Kumasaka, N; Atkinson, EJ; Schlicht, EM; Liu, JZ; Shah, T; Gutierrez-Achury, J; Boberg, KM; Bergquist, A; Vermeire, S; Eksteen, B; Durie, PR; Farkkila, M; Muller, T; Schramm, C; Sterneck, M; Weismuller, TJ; Gotthardt, DN; Ellinghaus, D; Braun, F; Teufel, A; Laudes, M; Lieb, W; Jacobs, G; Beuers, U; Weersma, RK; Wijmenga, C; Marschal…	Ji, Sun-Gou; Juran, Brian D.; Mucha, Soeren; Folseraas, Trine; Jostins, Luke; Melum, Espen; Kumasaka, Natsuhiko; Atkinson, Elizabeth J.; Schlicht, Erik M.; Liu, Jimmy Z.; Shah, Tejas; Gutierrez-Achury, Javier; Boberg, Kirsten M.; Bergquist, Annika; Vermeire, Severine; Eksteen, Bertus; Durie, Peter R.; Farkkila, Martti; Mueller, Tobias; Schramm, Christoph; Sterneck, Martina; Weismueller, Tobias J.…	Genome-wide association study of primary sclerosing cholangitis identifies new risk loci and quantifies the genetic relationship with inflammatory bowel disease	NATURE GENETICS	1061-4036	1546-1718	FEB	2017	49	2		10.1038/ng.3745	http://dx.doi.org/10.1038/ng.3745	27992413	WOS:000393148600016	View Full Record in Web of Science
Li, DW; Liang, YZ; Lu, J; Tan, Y	Li, Daowei; Liang, Yuanzi; Lu, Jia; Tan, Yue	An alternative splicing signature in human Crohn's disease	BMC GASTROENTEROLOGY		1471-230X	NOV 8	2021	21	1	420	10.1186/s12876-021-02001-2	http://dx.doi.org/10.1186/s12876-021-02001-2	34749666	WOS:000715797500003	View Full Record in Web of Science
Christodoulou, K; Wiskin, AE; Gibson, J; Tapper, W; Willis, C; Afzal, NA; Upstill-Goddard, R; Holloway, JW; Simpson, MA; Beattie, RM; Collins, A; Ennis, S	Christodoulou, Katja; Wiskin, Anthony E.; Gibson, Jane; Tapper, William; Willis, Claire; Afzal, Nadeem A.; Upstill-Goddard, Rosanna; Holloway, John W.; Simpson, Michael A.; Beattie, R. Mark; Collins, Andrew; Ennis, Sarah	Next generation exome sequencing of paediatric inflammatory bowel disease patients identifies rare and novel variants in candidate genes	GUT	0017-5749	1468-3288	JUL	2013	62	7		10.1136/gutjnl-2011-301833	http://dx.doi.org/10.1136/gutjnl-2011-301833	22543157	WOS:000319975900006	View Full Record in Web of Science
Vautrin, A; Manchon, L; Garcel, A; Campos, N; Lapasset, L; Laaref, AM; Bruno, R; Gislard, M; Dubois, E; Scherrer, D; Ehrlich, JH; Tazi, J	Vautrin, Audrey; Manchon, Laurent; Garcel, Aude; Campos, Noelie; Lapasset, Laure; Laaref, Abdelhamid Mahdi; Bruno, Roman; Gislard, Marie; Dubois, Emeric; Scherrer, Didier; Ehrlich, J. Hartmut; Tazi, Jamal	Both anti-inflammatory and antiviral properties of novel drug candidate ABX464 are mediated by modulation of RNA splicing	SCIENTIFIC REPORTS	2045-2322		JAN 28	2019	9		792	10.1038/s41598-018-37813-y	http://dx.doi.org/10.1038/s41598-018-37813-y	30692590	WOS:000456826200021	View Full Record in Web of Science
He, MR; Li, C; Tang, WX; Kang, YX; Zuo, YD; Wang, YF	He, Manrong; Li, Chao; Tang, Wanxin; Kang, Yingxi; Zuo, Yongdi; Wang, Yufang	Machine learning gene expression predicting model for ustekinumab response in patients with Crohn's disease	IMMUNITY INFLAMMATION AND DISEASE		2050-4527	DEC	2021	9	4		10.1002/iid3.506	http://dx.doi.org/10.1002/iid3.506	34469062	WOS:000691905300001	View Full Record in Web of Science
Khoshnevisan, R; Nekooei-Marnany, N; Klein, C; Kotlarz, D; Behnam, M; Ostadi, V; Yaran, M; Rezaei, A; Sherkat, R	Khoshnevisan, Razieh; Nekooei-Marnany, Nioosha; Klein, Christoph; Kotlarz, Daniel; Behnam, Mahdieh; Ostadi, Vajihe; Yaran, Majid; Rezaei, Abbas; Sherkat, Roya	IL-12R beta 1 deficiency corresponding to concurrency of two diseases, mendelian susceptibility to mycobacterial disease and Crohn's disease	JOURNAL OF CLINICAL TUBERCULOSIS AND OTHER MYCOBACTERIAL DISEASES	2405-5794		DEC	2019	17		100123	10.1016/j.jctube.2019.100123	http://dx.doi.org/10.1016/j.jctube.2019.100123	31788565	WOS:000658432000015	View Full Record in Web of Science
Ohya, S	Ohya, Susumu	Physiological Role of K+ Channels in the Regulation of T Cell Function	YAKUGAKU ZASSHI-JOURNAL OF THE PHARMACEUTICAL SOCIETY OF JAPAN	0031-6903		MAR	2016	136	3		10.1248/yakushi.15-00246-4	http://dx.doi.org/10.1248/yakushi.15-00246-4	26935090	WOS:000371196500020	View Full Record in Web of Science
Yanagi, T; Mizuochi, T; Takaki, Y; Eda, K; Mitsuyama, K; Ishimura, M; Takada, H; Shouval, DS; Griffith, AE; Snapper, SB; Yamashita, Y; Yamamoto, K	Yanagi, Tadahiro; Mizuochi, Tatsuki; Takaki, Yugo; Eda, Keisuke; Mitsuyama, Keiichi; Ishimura, Masataka; Takada, Hidetoshi; Shouval, Dror S.; Griffith, Alexandra E.; Snapper, Scott B.; Yamashita, Yushiro; Yamamoto, Ken	Novel exonic mutation inducing aberrant splicing in the IL10RA gene and resulting in infantile-onset inflammatory bowel disease: a case report	BMC GASTROENTEROLOGY	1471-230X		JAN 28	2016	16		10	10.1186/s12876-016-0424-5	http://dx.doi.org/10.1186/s12876-016-0424-5	26822028	WOS:000368873500001	View Full Record in Web of Science
Wang, ZT; Hu, JJ; Fan, R; Zhou, J; Zhong, J	Wang, Zheng-Ting; Hu, Jia-Jia; Fan, Rong; Zhou, Jie; Zhong, Jie	RAGE gene three polymorphisms with Crohn's disease susceptibility in Chinese Han population	WORLD JOURNAL OF GASTROENTEROLOGY	1007-9327	2219-2840	MAR 7	2014	20	9		10.3748/wjg.v20.i9.2397	http://dx.doi.org/10.3748/wjg.v20.i9.2397	24605038	WOS:000332692300028	View Full Record in Web of Science
Chesney, KL; Men, HS; Hankins, MA; Bryda, EC	Chesney, Kari L.; Men, Hongsheng; Hankins, Miriam A.; Bryda, Elizabeth C.	The Atg16l1 gene: characterization of wild type, knock-in, and knock-out phenotypes in rats	PHYSIOLOGICAL GENOMICS	1094-8341	1531-2267	JUN	2021	53	6		10.1152/physiolgenomics.00114.2020	http://dx.doi.org/10.1152/physiolgenomics.00114.2020	33818130	WOS:000697331900001	View Full Record in Web of Science
Rankin, CR; Shao, L; Elliott, J; Rowe, L; Patel, A; Videlock, E; Benhammou, JN; Sauk, JS; Ather, N; Corson, M; Alipour, O; Gulati, A; Pothoulakis, C; Padua, DM	Rankin, Carl Robert; Shao, Ling; Elliott, Julie; Rowe, Lorraine; Patel, Ami; Videlock, Elizabeth; Benhammou, Jihane N.; Sauk, Jenny S.; Ather, Nimah; Corson, Melissa; Alipour, Omeed; Gulati, Alakh; Pothoulakis, Charalabos; Padua, David Miguel	The IBD-associated long noncoding RNA IFNG-AS1 regulates the balance between inflammatory and anti-inflammatory cytokine production after T-cell stimulation	AMERICAN JOURNAL OF PHYSIOLOGY-GASTROINTESTINAL AND LIVER PHYSIOLOGY	0193-1857	1522-1547	JAN	2020	318	1		10.1152/ajpgi.00232.2019	http://dx.doi.org/10.1152/ajpgi.00232.2019	31545920	WOS:000507373700004	View Full Record in Web of Science
Seidelin, JB; Coskun, M; Vainer, B; Riis, L; Soendergaard, C; Nielsen, OH	Seidelin, Jakob Benedict; Coskun, Mehmet; Vainer, Ben; Riis, Lene; Soendergaard, Christoffer; Nielsen, Ole Haagen	ERK controls epithelial cell death receptor signalling and cellular FLICE-like inhibitory protein (c-FLIP) in ulcerative colitis	JOURNAL OF MOLECULAR MEDICINE-JMM	0946-2716		JUL	2013	91	7		10.1007/s00109-013-1003-7	http://dx.doi.org/10.1007/s00109-013-1003-7	23371318	WOS:000321129300007	View Full Record in Web of Science
Mailer, RKW; Joly, AL; Liu, S; Elias, S; Tegner, J; Andersson, J	Mailer, Reiner K. W.; Joly, Anne-Laure; Liu, Sang; Elias, Szabolcs; Tegner, Jesper; Andersson, John	IL-1 beta promotes Th17 differentiation by inducing alternative splicing of FOXP3	SCIENTIFIC REPORTS	2045-2322		OCT 6	2015	5		14674	10.1038/srep14674	http://dx.doi.org/10.1038/srep14674	26441347	WOS:000362257200001	View Full Record in Web of Science
Chang, JS; Ocvirk, S; Berger, E; Kisling, S; Binder, U; Skerra, A; Lee, AS; Haller, D	Chang, Jung-Su; Ocvirk, Soeren; Berger, Emanuel; Kisling, Sigrid; Binder, Uli; Skerra, Arne; Lee, Amy S.; Haller, Dirk	Endoplasmic Reticulum Stress Response Promotes Cytotoxic Phenotype of CD8 alpha beta(+) Intraepithelial Lymphocytes in a Mouse Model for Crohn's Disease-like Ileitis	JOURNAL OF IMMUNOLOGY	0022-1767	1550-6606	AUG 1	2012	189	3		10.4049/jimmunol.1200166	http://dx.doi.org/10.4049/jimmunol.1200166	22753943	WOS:000306599100048	View Full Record in Web of Science
Moon, CM; Kim, SW; Ahn, JB; Ma, HW; Che, X; Kim, TI; Kim, WH; Cheon, JH	Moon, Chang Mo; Kim, Seung Won; Ahn, Jae Bum; Ma, Hyun Woo; Che, Xiumei; Kim, Tae Il; Kim, Won Ho; Cheon, Jae Hee	Deep Resequencing of Ulcerative Colitis-Associated Genes Identifies Novel Variants in Candidate Genes in the Korean Population	INFLAMMATORY BOWEL DISEASES	1078-0998	1536-4844	AUG	2018	24	8		10.1093/ibd/izy122	http://dx.doi.org/10.1093/ibd/izy122	29733354	WOS:000449181900011	View Full Record in Web of Science
Pai, YC; Shih, DQ; Targan, SR; Turner, J; Wei, SC; Yu, LCH	Pai, Yu-Chen; Shih, David Q.; Targan, Stephan R.; Turner, Jerrold; Wei, Shu Chen; Yu, Linda C. H.	TL1A-MEDIATED BACTERIAL TRANSCYTOSIS BY A MLCK SPLICING VARIANT CONTRIBUTES TO INFLAMMATORY BOWEL DISEASE	GASTROENTEROLOGY	0016-5085	1528-0012	MAY	2020	158	6					WOS:000540349501502	View Full Record in Web of Science
Rankin, CR; Lokhandwala, ZA; Huang, R; Pekow, J; Pothoulakis, C; Padua, D	Rankin, Carl Robert; Lokhandwala, Zulfiqar Ali; Huang, Raymond; Pekow, Joel; Pothoulakis, Charalabos; Padua, David	Linear and circular CDKN2B-AS1 expression is associated with Inflammatory Bowel Disease and participates in intestinal barrier formation	LIFE SCIENCES	0024-3205	1879-0631	AUG 15	2019	231		116571	10.1016/j.lfs.2019.116571	http://dx.doi.org/10.1016/j.lfs.2019.116571	31207308	WOS:000481620400052	View Full Record in Web of Science
Li, C; Vu, K; Hazelgrove, K; Kuemmerle, JF	Li, Chao; Vu, Kent; Hazelgrove, Krystina; Kuemmerle, John F.	Increased IGF-IEc expression and mechano-growth factor production in intestinal muscle of fibrostenotic Crohn's disease and smooth muscle hypertrophy	AMERICAN JOURNAL OF PHYSIOLOGY-GASTROINTESTINAL AND LIVER PHYSIOLOGY	0193-1857	1522-1547	DEC 1	2015	309	11		10.1152/ajpgi.00414.2014	http://dx.doi.org/10.1152/ajpgi.00414.2014	26428636	WOS:000365878100004	View Full Record in Web of Science
Dara, N; Nemati, S; Teimourian, S; Imanzadeh, F; Hosseini, A; Tajalli, S; Sayyari, AA; Najafi, A; Rohani, P; Khatami, K; Motevaseli, E; de Boer, M; Kuijpers, TW	Dara, Naghi; Nemati, Sharam; Teimourian, Sharam; Imanzadeh, Farid; Hosseini, Amirhossein; Tajalli, Saleheh; Sayyari, Ali Akbar; Najafi, Ali; Rohani, Pejman; Khatami, Katayoun; Motevaseli, Elahe; de Boer, Martin; Kuijpers, Taco W.	Diagnostic Challenges in the Early Onset of Inflammatory Bowel Disease: A Case Report	INTERNATIONAL JOURNAL OF MOLECULAR AND CELLULAR MEDICINE	2251-9637	2251-9645	FAL	2018	7	4		10.22088/IJMCM.BUMS.7.4.251	http://dx.doi.org/10.22088/IJMCM.BUMS.7.4.251	31516885	WOS:000478723500007	View Full Record in Web of Science
Rothschild, DE; Zhang, Y; Diao, N; Lee, CK; Chen, KQ; Caswell, CC; Slade, DJ; Helm, RF; LeRoith, T; Li, LW; Allen, IC	Rothschild, Daniel E.; Zhang, Yao; Diao, Na; Lee, Christina K.; Chen, Keqiang; Caswell, Clayton C.; Slade, Daniel J.; Helm, Richard F.; LeRoith, Tanya; Li, Liwu; Allen, Irving C.	Enhanced Mucosal Defense and Reduced Tumor Burden in Mice with the Compromised Negative Regulator IRAK-M	EBIOMEDICINE	2352-3964		FEB	2017	15			10.1016/j.ebiom.2016.11.039	http://dx.doi.org/10.1016/j.ebiom.2016.11.039	27939424	WOS:000395258200009	View Full Record in Web of Science
Wittig, BM; Sabat, R; Holzlohner, P; Witte-Handel, E; Heilmann, K; Witte, K; Triebus, J; Tzankov, A; Laman, JD; Bokemeyer, B; Terracciano, L; Schwarzler, C; Kohler, H; Volkmer, R; Loddenkemper, C; Wolk, K; Hoffmann, U; Gunthert, U	Wittig, B. M.; Sabat, R.; Holzloehner, P.; Witte-Haendel, E.; Heilmann, K.; Witte, K.; Triebus, J.; Tzankov, A.; Laman, J. D.; Bokemeyer, B.; Terracciano, L.; Schwarzler, C.; Kohler, H.; Volkmer, R.; Loddenkemper, C.; Wolk, K.; Hoffmann, U.; Gunthert, U.	Absence of specific alternatively spliced exon of CD44 in macrophages prevents colitis	MUCOSAL IMMUNOLOGY	1933-0219	1935-3456	MAY	2018	11	3		10.1038/mi.2017.98	http://dx.doi.org/10.1038/mi.2017.98	29186109	WOS:000433899600023	View Full Record in Web of Science
Bootz, F; Ziffels, B; Neri, D	Bootz, Franziska; Ziffels, Barbara; Neri, Dario	Antibody-Based Targeted Delivery of Interleukin-22 Promotes Rapid Clinical Recovery in Mice With DSS-Induced Colitis	INFLAMMATORY BOWEL DISEASES	1078-0998	1536-4844	SEP	2016	22	9		10.1097/MIB.0000000000000851	http://dx.doi.org/10.1097/MIB.0000000000000851	27482975	WOS:000384464800014	View Full Record in Web of Science
Ghobadi, F; Vaisi-Raygani, A; Bahrehmand, F; Tanhapour, M; Kiani, A; Rahimi, Z; Pourmotabbed, T	Ghobadi, Farideh; Vaisi-Raygani, Asad; Bahrehmand, Fariborz; Tanhapour, Maryam; Kiani, Amir; Rahimi, Zohreh; Pourmotabbed, Tayebeh	Genetic Variants of Pre-microRNAs A(-499)G(rs3746444) and T-196a2C(rs11614913) with Ulcerative Colitis (UC) and Investigated with Thiopurine-S-Methyltransferase (TPMT) Activity	CLINICAL LABORATORY	1433-6510			2017	63	10		10.7754/Clin.Lab.2017.170502	http://dx.doi.org/10.7754/Clin.Lab.2017.170502	29035443	WOS:000413571800017	View Full Record in Web of Science
Tang, YL; Reissig, S; Glasmacher, E; Regen, T; Wanke, F; Nikolaev, A; Gerlach, K; Popp, V; Karram, K; Fantini, MC; Schattenberg, JM; Galle, PR; Neurath, MF; Weigmann, B; Kurschus, FC; Hovelmeyer, N; Waisman, A	Tang, Yilang; Reissig, Sonja; Glasmacher, Elke; Regen, Tommy; Wanke, Florian; Nikolaev, Alexei; Gerlach, Katharina; Popp, Vanessa; Karram, Khalad; Fantini, Massimo C.; Schattenberg, Jam M.; Galle, Peter R.; Neurath, Markus F.; Weigmann, Benno; Kurschus, Florian C.; Hoevelmeyer, Nadine; Waisman, Ari	Alternative Splice Forms of CYLD Mediate Ubiquitination of SMAD7 to Prevent TGFB Signaling and Promote Colitis	GASTROENTEROLOGY	0016-5085	1528-0012	FEB	2019	156	3		10.1053/j.gastro.2018.10.023	http://dx.doi.org/10.1053/j.gastro.2018.10.023	30315770	WOS:000457714300030	View Full Record in Web of Science
Haisma, SM; Weersma, RK; Joosse, ME; de Koning, BAE; de Meij, T; Koot, BGP; Wolters, V; Norbruis, O; Daly, MJ; Stevens, C; Xavier, RJ; Koskela, J; Rivas, MA; Visschedijk, MC; Verkade, HJ; Barbieri, R; Jansen, DBH; Festen, EAM; van Rheenen, PF; van Diemen, CC	Haisma, Sjoukje-Marije; Weersma, Rinse K.; Joosse, Maria E.; de Koning, Barbara A. E.; de Meij, Tim; Koot, Bart G. P.; Wolters, Victorien; Norbruis, Obbe; Daly, Mark J.; Stevens, Christine; Xavier, Ramnik J.; Koskela, Jukka; Rivas, Manuel A.; Visschedijk, Marijn C.; Verkade, Henkjan J.; Barbieri, Ruggero; Jansen, Dianne B. H.; Festen, Eleonora A. M.; van Rheenen, Patrick F.; van Diemen, Cleo C.	Exome sequencing in patient-parent trios suggests new candidate genes for early-onset primary sclerosing cholangitis	LIVER INTERNATIONAL	1478-3223	1478-3231	MAY	2021	41	5		10.1111/liv.14831	http://dx.doi.org/10.1111/liv.14831	33590606	WOS:000627507500001	View Full Record in Web of Science
Lord, JD; Valliant-Saunders, K; Hahn, H; Thirlby, RC; Ziegler, SF	Lord, James D.; Valliant-Saunders, Karine; Hahn, Hejin; Thirlby, Richard C.; Ziegler, Steven F.	Paradoxically Increased FOXP3+T Cells in IBD Do Not Preferentially Express the Isoform of FOXP3 Lacking Exon 2	DIGESTIVE DISEASES AND SCIENCES	0163-2116	1573-2568	NOV	2012	57	11		10.1007/s10620-012-2292-3	http://dx.doi.org/10.1007/s10620-012-2292-3	22736020	WOS:000309867800031	View Full Record in Web of Science
Murugan, D; Albert, MH; Langemeier, J; Bohne, J; Puchalka, J; Jarvinen, PM; Hauck, F; Klenk, AK; Prell, C; Schatz, S; Diestelhorst, J; Sciskala, B; Kohistani, N; Belohradsky, BH; Muller, S; Kirchner, T; Walter, MR; Bufler, P; Muise, AM; Snapper, SB; Koletzko, S; Klein, C; Kotlarz, D	Murugan, Dhaarini; Albert, Michael H.; Langemeier, Joerg; Bohne, Jens; Puchalka, Jacek; Jaervinen, Paeivi M.; Hauck, Fabian; Klenk, Anne K.; Prell, Christine; Schatz, Stephanie; Diestelhorst, Jana; Sciskala, Barbara; Kohistani, Naschla; Belohradsky, Bernd H.; Mueller, Susanna; Kirchner, Thomas; Walter, Mark R.; Bufler, Philip; Muise, Aleixo M.; Snapper, Scott B.; Koletzko, Sibylle; Klein, Christo…	Very Early Onset Inflammatory Bowel Disease Associated with Aberrant Trafficking of IL-10R1 and Cure by T Cell Replete Haploidentical Bone Marrow Transplantation	JOURNAL OF CLINICAL IMMUNOLOGY	0271-9142	1573-2592	APR	2014	34	3		10.1007/s10875-014-9992-8	http://dx.doi.org/10.1007/s10875-014-9992-8	24519095	WOS:000336046800011	View Full Record in Web of Science
Jung, ES; Petersen, BS; Mayr, G; Cheon, JH; Kang, Y; Lee, SJ; Che, X; Kim, WH; Kim, S; Schreiber, S; Franke, A; Koh, H	Jung, Eun Suk; Petersen, Britt-Sabina; Mayr, Gabriele; Cheon, Jae Hee; Kang, Yunkoo; Lee, Seok Joo; Che, Xiumei; Kim, Won Ho; Kim, Seung; Schreiber, Stefan; Franke, Andre; Koh, Hong	Compound heterozygous mutations in IL10RA combined with a complement factor properdin mutation in infantile-onset inflammatory bowel disease	EUROPEAN JOURNAL OF GASTROENTEROLOGY & HEPATOLOGY	0954-691X	1473-5687	DEC	2018	30	12		10.1097/MEG.0000000000001247	http://dx.doi.org/10.1097/MEG.0000000000001247	30199474	WOS:000449639200015	View Full Record in Web of Science
Klein, BY; Tamir, H; Hirschberg, DL; Glickstein, SB; Ludwig, RJ; Welch, MG	Klein, Benjamin Y.; Tamir, Hadassah; Hirschberg, David L.; Glickstein, Sara B.; Ludwig, Robert J.; Welch, Martha G.	Oxytocin modulates markers of the unfolded protein response in Caco2BB gut cells	CELL STRESS & CHAPERONES	1355-8145	1466-1268	JUL	2014	19	4		10.1007/s12192-013-0473-4	http://dx.doi.org/10.1007/s12192-013-0473-4	24198165	WOS:000336976100002	View Full Record in Web of Science
Yanai, S; Yamaguchi, S; Nakamura, S; Kawasaki, K; Toya, Y; Yamada, N; Eizuka, M; Uesugi, N; Umeno, J; Esaki, M; Okimoto, E; Ishihara, S; Sugai, T; Matsumoto, T	Yanai, Shunichi; Yamaguchi, Satoko; Nakamura, Shotaro; Kawasaki, Keisuke; Toya, Yosuke; Yamada, Noriyuki; Eizuka, Makoto; Uesugi, Noriyuki; Umeno, Junji; Esaki, Motohiro; Okimoto, Eiko; Ishihara, Shunji; Sugai, Tamotsu; Matsumoto, Takayuki	Distinction between Chronic Enteropathy Associated with the SLCO2A1 Gene and Crohn's Disease	GUT AND LIVER	1976-2283	2005-1212	JAN	2019	13	1		10.5009/gnl18261	http://dx.doi.org/10.5009/gnl18261	30400730	WOS:000455765000012	View Full Record in Web of Science
Hong, SN; Park, C; Park, SJ; Lee, CK; Ye, BD; Kim, YS; Lee, S; Chae, J; Kim, JI; Kim, YH	Hong, Sung Noh; Park, Changho; Park, Soo Jung; Lee, Chang Kyun; Ye, Byong Duk; Kim, You Sun; Lee, Seungbok; Chae, Jeesoo; Kim, Jong-Il; Kim, Young-Ho	Deep resequencing of 131 Crohn's disease associated genes in pooled DNA confirmed three reported variants and identified eight novel variants	GUT	0017-5749	1468-3288	MAY	2016	65	5		10.1136/gutjnl-2014-308617	http://dx.doi.org/10.1136/gutjnl-2014-308617	25731871	WOS:000374119400013	View Full Record in Web of Science
Xiu, MX; Liu, YM; Chen, GY; Hu, C; Kuang, BH	Xiu, Meng-xi; Liu, Yuan-meng; Chen, Guang-yuan; Hu, Cong; Kuang, Bo-hai	Identifying Hub Genes, Key Pathways and Immune Cell Infiltration Characteristics in Pediatric and Adult Ulcerative Colitis by Integrated Bioinformatic Analysis	DIGESTIVE DISEASES AND SCIENCES	0163-2116	1573-2568	SEP	2021	66	9		10.1007/s10620-020-06611-w	http://dx.doi.org/10.1007/s10620-020-06611-w	32974809	WOS:000572602000001	View Full Record in Web of Science
Escudero-Hernandez, C; Martinez-Abad, B; Ruiperez, V; Garrote, JA; Arranz, E	Escudero-Hernandez, Celia; Martinez-Abad, Beatriz; Ruiperez, Violeta; Garrote, Jose A.; Arranz, Eduardo	New IL-15 receptor-alpha splicing variants identified in intestinal epithelial Caco-2 cells	INNATE IMMUNITY	1753-4259	1753-4267	JAN	2017	23	1		10.1177/1753425916674263	http://dx.doi.org/10.1177/1753425916674263	27794069	WOS:000398220700005	View Full Record in Web of Science
Pai, YC; Weng, LT; Wei, SC; Wu, LL; Shih, DQ; Targan, SR; Turner, JR; Yu, LCH	Pai, Yu-Chen; Weng, Li-Ting; Wei, Shu-Chen; Wu, Li-Ling; Shih, David Q.; Targan, Stephen R.; Turner, Jerrold R.; Yu, Linda Chia-Hui	Gut Microbial Transcytosis Induced by Tumour Necrosis Factor-like 1A-dependent Activation of a Myosin Light Chain Kinase Splice Variant Contributes to Inflammatory Bowel Disease	JOURNAL OF CROHNS & COLITIS	1873-9946	1876-4479	FEB	2021	15	2		10.1093/ecco-jcc/jjaa165	http://dx.doi.org/10.1093/ecco-jcc/jjaa165	32770194	WOS:000637045700009	View Full Record in Web of Science
Yunusi, K; Zhang, JP; Zhong, L; Mosha, G; Nuermaimaiti, A; Abudula, M; Upur, H	Yunusi, Kurexi; Zhang, Jingping; Zhong, Li; Mosha, Gulinisha; Nuermaimaiti, Ajiguli; Abudula, Mairipaiti; Upur, Halmurat	Uygur Medicine Xipayi Kui Jie'an Affects Gene Expression profiles in intestinal tissue Lesions in a Rat Model of Ulcerative Colitis	BMC COMPLEMENTARY AND ALTERNATIVE MEDICINE		1472-6882	MAY 22	2015	15		152	10.1186/s12906-015-0672-x	http://dx.doi.org/10.1186/s12906-015-0672-x	25997744	WOS:000354853000001	View Full Record in Web of Science
Dhillon, SS; Fattouh, R; Elkadri, A; Xu, W; Murchie, R; Walters, T; Guo, CH; Mack, D; Huynh, HQ; Baksh, S; Silverberg, MS; Griffiths, AM; Snapper, SB; Brumell, JH; Muise, AM	Dhillon, Sandeep S.; Fattouh, Ramzi; Elkadri, Abdul; Xu, Wei; Murchie, Ryan; Walters, Thomas; Guo, Conghui; Mack, David; Huynh, Hien Q.; Baksh, Shairaz; Silverberg, Mark S.; Griffiths, Anne M.; Snapper, Scott B.; Brumell, John H.; Muise, Aleixo M.	Variants in Nicotinamide Adenine Dinucleotide Phosphate Oxidase Complex Components Determine Susceptibility to Very Early Onset Inflammatory Bowel Disease	GASTROENTEROLOGY	0016-5085	1528-0012	SEP	2014	147	3		10.1053/j.gastro.2014.06.005	http://dx.doi.org/10.1053/j.gastro.2014.06.005	24931457	WOS:000341402700029	View Full Record in Web of Science
Iacomino, G; Aufiero, VR; Iannaccone, N; Melina, R; Giardullo, N; De Chiara, G; Venezia, A; Taccone, FS; Iaquinto, G; Mazzarella, G	Iacomino, Giuseppe; Aufiero, Vera Rotondi; Iannaccone, Nunzia; Melina, Raffaele; Giardullo, Nicola; De Chiara, Giovanni; Venezia, Antonella; Taccone, Fabio Silvio; Iaquinto, Gaetano; Mazzarella, Giuseppe	IBD: Role of intestinal compartments in the mucosal immune response	IMMUNOBIOLOGY	0171-2985		JAN	2020	225	1	151849	10.1016/j.imbio.2019.09.008	http://dx.doi.org/10.1016/j.imbio.2019.09.008	31563276	WOS:000525827600011	View Full Record in Web of Science
Griesenauer, B; Paczesny, S	Griesenauer, Brad; Paczesny, Sophie	The ST2/IL-33 Axis in immune Cells during inflammatory Diseases	FRONTIERS IN IMMUNOLOGY	1664-3224		APR 24	2017	8		475	10.3389/fimmu.2017.00475	http://dx.doi.org/10.3389/fimmu.2017.00475	28484466	WOS:000399837900001	View Full Record in Web of Science
Hao, XH; Yao, AL; Gong, JF; Zhu, WM; Li, N; Li, JS	Hao, Xianhua; Yao, Anlong; Gong, Jianfeng; Zhu, Weiming; Li, Ning; Li, Jieshou	Berberine Ameliorates Pro-inflammatory Cytokine-Induced Endoplasmic Reticulum Stress in Human Intestinal Epithelial Cells In Vitro	INFLAMMATION	0360-3997	1573-2576	JUN	2012	35	3		10.1007/s10753-011-9385-6	http://dx.doi.org/10.1007/s10753-011-9385-6	21922249	WOS:000303382400009	View Full Record in Web of Science
Karamanolis, G; Maragkoudaki, M; Vaiopoulou, A; Theodoropoulos, G; Gazouli, M	Karamanolis, G.; Maragkoudaki, M.; Vaiopoulou, A.; Theodoropoulos, G.; Gazouli, M.	OCT4B1, a spliced variant of OCT4, is expressed in Inflammatory Bowel Disease	JOURNAL OF CROHNS & COLITIS	1873-9946	1876-4479	FEB	2015	9						WOS:000353811200192	View Full Record in Web of Science
Vlachakis, D; Labrou, NE; Iliopoulos, C; Hardy, J; Lewis, PA; Rideout, H; Trabzuni, D	Vlachakis, Dimitrios; Labrou, Nikolaos E.; Iliopoulos, Costas; Hardy, John; Lewis, Patrick A.; Rideout, Hardy; Trabzuni, Daniah	Insights into the Influence of Specific Splicing Events on the Structural Organization of LRRK2	INTERNATIONAL JOURNAL OF MOLECULAR SCIENCES		1422-0067	SEP	2018	19	9	2784	10.3390/ijms19092784	http://dx.doi.org/10.3390/ijms19092784	30223621	WOS:000449988100320	View Full Record in Web of Science
Karaky, M; Fedetz, M; Potenciano, V; Andres-Leon, E; Codina, AE; Barrionuevo, C; Alcina, A; Matesanz, F	Karaky, Mohamad; Fedetz, Maria; Potenciano, Victor; Andres-Leon, Eduardo; Esteve Codina, Anna; Barrionuevo, Cristina; Alcina, Antonio; Matesanz, Fuencisla	SP140 regulates the expression of immune-related genes associated with multiple sclerosis and other autoimmune diseases by NF-kappa B inhibition	HUMAN MOLECULAR GENETICS	0964-6906	1460-2083	DEC 1	2018	27	23		10.1093/hmg/ddy284	http://dx.doi.org/10.1093/hmg/ddy284	30102396	WOS:000452536200002	View Full Record in Web of Science
Esmaeilzadeh, H; Bordbar, MR; Dastsooz, H; Silawi, M; Fard, MAF; Adib, A; Kafashan, A; Tabatabaei, Z; Sadeghipour, F; Faghihi, MA	Esmaeilzadeh, Hossein; Bordbar, Mohammad Reza; Dastsooz, Hassan; Silawi, Mohammad; Fard, Mohammad Ali Farazi; Adib, Ali; Kafashan, Ali; Tabatabaei, Zahra; Sadeghipour, Forough; Faghihi, Mohammad Ali	A novel splice site mutation in WAS gene in patient with Wiskott-Aldrich syndrome and chronic colitis: a case report	BMC MEDICAL GENETICS	1471-2350		JUL 20	2018	19		123	10.1186/s12881-018-0647-0	http://dx.doi.org/10.1186/s12881-018-0647-0	30029636	WOS:000439504000003	View Full Record in Web of Science
Verstockt, S; Vancamelbeke, M; Verstockt, B; Schuit, F; Ferrante, M; Vermeire, S; Cleynen, I; Arijs, I	Verstockt, S.; Vancamelbeke, M.; Verstockt, B.; Schuit, F.; Ferrante, M.; Vermeire, S.; Cleynen, I.; Arijs, I.	Exon-level microarrays identify alternative splicing for ICAM3 in Crohn's disease	JOURNAL OF CROHNS & COLITIS	1873-9946	1876-4479	MAR	2016	10						WOS:000374496600125	View Full Record in Web of Science
Mehta, S; Cronkite, DA; Basavappa, M; Saunders, TL; Adiliaghdam, F; Amatullah, H; Morrison, SA; Pagan, JD; Anthony, RM; Tonnerre, P; Lauer, GM; Lee, JC; Digumarthi, S; Pantano, L; Sui, SJH; Ji, F; Sadreyev, R; Zhou, C; Mullen, AC; Kumar, V; Li, Y; Wijmenga, C; Xavier, RJ; Means, TK; Jeffrey, KL	Mehta, Stuti; Cronkite, D. Alexander; Basavappa, Megha; Saunders, Tahnee L.; Adiliaghdam, Fatemeh; Amatullah, Hajera; Morrison, Sara A.; Pagan, Jose D.; Anthony, Robert M.; Tonnerre, Pierre; Lauer, Georg M.; Lee, James C.; Digumarthi, Sreehaas; Pantano, Lorena; Sui, Shannan J. Ho; Ji, Fei; Sadreyev, Ruslan; Zhou, Chan; Mullen, Alan C.; Kumar, Vinod; Li, Yang; Wijmenga, Cisca; Xavier, Ramnik J.; M…	Maintenance of macrophage transcriptional programs and intestinal homeostasis by epigenetic reader SP140	SCIENCE IMMUNOLOGY	2470-9468		MAR	2017	2	9	eaag3160	10.1126/sciimmunol.aag3160	http://dx.doi.org/10.1126/sciimmunol.aag3160	28783698	WOS:000434313400001	View Full Record in Web of Science
Ouahed, J; Kelsen, JR; Spessott, WA; Kooshesh, K; Sanmillan, ML; Dawany, N; Sullivan, KE; Hamilton, KE; Slowik, V; Nejentsev, S; Neves, JF; Flores, H; Chung, WK; Wilson, A; Anyane-Yeboa, K; Wou, K; Jain, P; Field, M; Tollefson, S; Dent, MH; Li, DL; Naito, T; McGovern, DPB; Kwong, AC; Taliaferro, F; Ordovas-Montanes, J; Horwitz, BH; Kotlarz, D; Klein, C; Evans, J; Dorsey, J; Warner, N; Elkadri, A;…	Ouahed, Jodie; Kelsen, Judith R.; Spessott, Waldo A.; Kooshesh, Kameron; Sanmillan, Maria L.; Dawany, Noor; Sullivan, Kathleen E.; Hamilton, Kathryn E.; Slowik, Voytek; Nejentsev, Sergey; Neves, Joao Farela; Flores, Helena; Chung, Wendy K.; Wilson, Ashley; Anyane-Yeboa, Kwame; Wou, Karen; Jain, Preti; Field, Michael; Tollefson, Sophia; Dent, Maiah H.; Li, Dalin; Naito, Takeo; McGovern, Dermot P. …	Variants in STXBP3 are Associated with Very Early Onset Inflammatory Bowel Disease, Bilateral Sensorineural Hearing Loss and Immune Dysregulation	JOURNAL OF CROHNS & COLITIS	1873-9946	1876-4479	NOV	2021	15	11		10.1093/ecco-jcc/jjab077	http://dx.doi.org/10.1093/ecco-jcc/jjab077	33891011	WOS:000720772000015	View Full Record in Web of Science
Khawar, B; Abbasi, MH; Sheikh, N	Khawar, Babar; Abbasi, Muddasir Hassan; Sheikh, Nadeem	A panoramic spectrum of complex interplay between the immune system and IL-32 during pathogenesis of various systemic infections and inflammation	EUROPEAN JOURNAL OF MEDICAL RESEARCH	0949-2321	2047-783X	JAN 28	2015	20		7	10.1186/s40001-015-0083-y	http://dx.doi.org/10.1186/s40001-015-0083-y	25626592	WOS:000349475100001	View Full Record in Web of Science
Low, END; Wong, Z; Ngiu, CS; Nazefah, AH; Rafiz, AR; Mokhtar, N; Ali, RAR	Low, E. N. D.; Wong, Z.; Ngiu, C. S.; Nazefah, A. H.; Rafiz, A. R.; Mokhtar, N.; Ali, R. A. Raja	Identification of alternative splicing in transcript isoforms in patients with ulcerative colitis: effects of disease duration	JOURNAL OF CROHNS & COLITIS	1873-9946	1876-4479	FEB 1	2017	11						WOS:000398606900159	View Full Record in Web of Science
Hughes, PA; Costello, SP; Bryant, RV; Andrews, JM	Hughes, Patrick A.; Costello, Samuel P.; Bryant, Robert V.; Andrews, Jane M.	Opioidergic effects on enteric and sensory nerves in the lower GI tract: basic mechanisms and clinical implications	AMERICAN JOURNAL OF PHYSIOLOGY-GASTROINTESTINAL AND LIVER PHYSIOLOGY	0193-1857	1522-1547	SEP 1	2016	311	3		10.1152/ajpgi.00442.2015	http://dx.doi.org/10.1152/ajpgi.00442.2015	27469369	WOS:000384772600016	View Full Record in Web of Science
Wang, YL; He, KX; Sheng, BF; Lei, XQ; Tao, WY; Zhu, XL; Wei, Z; Fu, RJ; Wang, AL; Bai, SD; Zhang, Z; Hong, N; Ye, C; Tian, Y; Wang, J; Li, MS; Zhang, KG; Li, L; Yang, H; Li, HB; Flavell, RA; Zhu, S	Wang, Yalong; He, Kaixin; Sheng, Baifa; Lei, Xuqiu; Tao, Wanyin; Zhu, Xiaoliang; Wei, Zheng; Fu, Rongjie; Wang, Anlei; Bai, Shengdan; Zhang, Zhao; Hong, Na; Ye, Chao; Tian, Ye; Wang, Jun; Li, Mingsong; Zhang, Kaiguang; Li, Lin; Yang, Hua; Li, Hua-Bing; Flavell, Richard A.; Zhu, Shu	The RNA helicase Dhx15 mediates Wnt-induced antimicrobial protein expression in Paneth cells	PROCEEDINGS OF THE NATIONAL ACADEMY OF SCIENCES OF THE UNITED STATES OF AMERICA	0027-8424		JAN 26	2021	118	4	e2017432118	10.1073/pnas.2017432118	http://dx.doi.org/10.1073/pnas.2017432118	33483420	WOS:000612945500043	View Full Record in Web of Science
Trabzuni, D; Ryten, M; Emmett, W; Ramasamy, A; Lackner, KJ; Zeller, T; Walker, R; Smith, C; Lewis, PA; Mamais, A; de Silva, R; Vandrovcova, J; Hernandez, D; Nalls, MA; Sharma, M; Garnier, S; Lesage, S; Simon-Sanchez, J; Gasser, T; Heutink, P; Brice, A; Singleton, A; Cai, HB; Schadt, E; Wood, NW; Bandopadhyay, R; Weale, ME; Hardy, J; Plagnol, V	Trabzuni, Daniah; Ryten, Mina; Emmett, Warren; Ramasamy, Adaikalavan; Lackner, Karl J.; Zeller, Tanja; Walker, Robert; Smith, Colin; Lewis, Patrick A.; Mamais, Adamantios; de Silva, Rohan; Vandrovcova, Jana; Hernandez, Dena; Nalls, Michael A.; Sharma, Manu; Garnier, Sophie; Lesage, Suzanne; Simon-Sanchez, Javier; Gasser, Thomas; Heutink, Peter; Brice, Alexis; Singleton, Andrew; Cai, Huaibin; Scha…	Fine-Mapping, Gene Expression and Splicing Analysis of the Disease Associated LRRK2 Locus	PLOS ONE	1932-6203		AUG 13	2013	8	8	e70724	10.1371/journal.pone.0070724	http://dx.doi.org/10.1371/journal.pone.0070724	23967090	WOS:000323115800015	View Full Record in Web of Science
Rankin, CR; Treger, J; Faure-Kumar, E; Benhammou, J; Anisman-Posner, D; Bollinger, AE; Pothoulakis, C; Padua, DM	Rankin, Carl Robert; Treger, Janet; Faure-Kumar, Emmanuelle; Benhammou, Jihane; Anisman-Posner, Deborah; Bollinger, Alex Edward; Pothoulakis, Charalabos; Padua, David Miguel	Overexpressing Long Noncoding RNAs Using Gene-activating CRISPR	JOVE-JOURNAL OF VISUALIZED EXPERIMENTS	1940-087X		MAR	2019		145	e59233	10.3791/59233	http://dx.doi.org/10.3791/59233	30882798	WOS:000462909500091	View Full Record in Web of Science
Glasser, CL; Picoraro, JA; Jain, P; Kinberg, S; Rustia, E; Margolis, KG; Anyane-Yeboa, K; Iglesias, AD; Green, NS	Glasser, Chana L.; Picoraro, Joseph A.; Jain, Preti; Kinberg, Sivan; Rustia, Evelyn; Margolis, Kara Gross; Anyane-Yeboa, Kwame; Iglesias, Alejandro D.; Green, Nancy S.	Phenotypic Heterogeneity of Neutropenia and Gastrointestinal Illness Associated with G6PC3 Founder Mutation	JOURNAL OF PEDIATRIC HEMATOLOGY ONCOLOGY	1077-4114	1536-3678	OCT	2016	38	7		10.1097/MPH.0000000000000660	http://dx.doi.org/10.1097/MPH.0000000000000660	27571123	WOS:000385523700007	View Full Record in Web of Science
Triner, D; Castillo, C; Hakim, JB; Xue, X; Greenson, JK; Nunez, G; Chen, GY; Colacino, JA; Shah, YM	Triner, Daniel; Castillo, Cristina; Hakim, Joe B.; Xue, Xiang; Greenson, Joel K.; Nunez, Gabriel; Chen, Grace Y.; Colacino, Justin A.; Shah, Yatrik M.	Myc-Associated Zinc Finger Protein Regulates the Proinflammatory Response in Colitis and Colon Cancer via STAT3 Signaling	MOLECULAR AND CELLULAR BIOLOGY	0270-7306	1098-5549	NOV	2018	38	22	e00386-18	10.1128/MCB.00386-18	http://dx.doi.org/10.1128/MCB.00386-18	30181395	WOS:000448526000006	View Full Record in Web of Science
Dong, CL; Greathouse, KM; Beacham, RL; Palladino, SP; Helton, ES; Ubogu, EE	Dong, Chaoling; Greathouse, Kelsey M.; Beacham, Rebecca L.; Palladino, Steven P.; Helton, E. Scott; Ubogu, Eroboghene E.	Fibronectin connecting segment-1 peptide inhibits pathogenic leukocyte trafficking and inflammatory demyelination in experimental models of chronic inflammatory demyelinating polyradiculoneuropathy	EXPERIMENTAL NEUROLOGY	0014-4886	1090-2430	JUN	2017	292			10.1016/j.expneurol.2017.02.012	http://dx.doi.org/10.1016/j.expneurol.2017.02.012	28215575	WOS:000400310100004	View Full Record in Web of Science
Coope, A; Pascoal, LB; Botezelli, JD; da Silva, FAR; Ayrizono, MDS; Rodrigues, BL; Milanski, M; Carvalho, RB; Fagundes, JJ; Velloso, LA; Leal, RF	Coope, Andressa; Pascoal, Livia Bitencourt; Botezelli, Jose Diego; Ramos da Silva, Francesca Aparecida; Setsuko Ayrizono, Maria de Lourdes; Rodrigues, Bruno Lima; Milanski, Marciane; Carvalho, Rita Barbosa; Fagundes, Joao Jose; Velloso, Licio Augusto; Leal, Raquel Franco	ER stress activation in the intestinal mucosa but not in mesenteric adipose tissue is associated with inflammation in Crohn's disease patients	PLOS ONE	1932-6203		SEP 26	2019	14	9	e0223105	10.1371/journal.pone.0223105	http://dx.doi.org/10.1371/journal.pone.0223105	31557250	WOS:000532345500068	View Full Record in Web of Science
Kang, I; Barth, JL; Sproul, EP; Yoon, DW; Workman, GA; Braun, KR; Argraves, WS; Wight, TN	Kang, Inkyung; Barth, Jeremy L.; Sproul, Erin P.; Yoon, Dong Won; Workman, Gail A.; Braun, Kathleen R.; Argraves, W. Scott; Wight, Thomas N.	Expression of V3 Versican by Rat Arterial Smooth Muscle Cells Promotes Differentiated and Anti-inflammatory Phenotypes	JOURNAL OF BIOLOGICAL CHEMISTRY		1083-351X	AUG 28	2015	290	35		10.1074/jbc.M115.657486	http://dx.doi.org/10.1074/jbc.M115.657486	26152723	WOS:000360637600035	View Full Record in Web of Science
Suzuki, T; Sasahara, Y; Kikuchi, A; Kakuta, H; Kashiwabara, T; Ishige, T; Nakayama, Y; Tanaka, M; Hoshino, A; Kanegane, H; Abukawa, D; Kure, S	Suzuki, Tasuku; Sasahara, Yoji; Kikuchi, Atsuo; Kakuta, Humihiko; Kashiwabara, Toshihiko; Ishige, Takashi; Nakayama, Yoshiko; Tanaka, Masanori; Hoshino, Akihiro; Kanegane, Hirokazu; Abukawa, Daiki; Kure, Shigeo	Targeted Sequencing and Immunological Analysis Reveal the Involvement of Primary Immunodeficiency Genes in Pediatric IBD: a Japanese Multicenter Study	JOURNAL OF CLINICAL IMMUNOLOGY	0271-9142	1573-2592	JAN	2017	37	1		10.1007/s10875-016-0339-5	http://dx.doi.org/10.1007/s10875-016-0339-5	27747465	WOS:000392298100016	View Full Record in Web of Science
Diez-Obrero, V; Dampier, CH; Moratalla-Navarro, F; Devall, M; Plummer, SJ; Diez-Villanueva, A; Peters, U; Bien, S; Huyghe, JR; Kundaje, A; Ibanez-Sanz, G; Guino, E; Obon-Santacana, M; Carreras-Torres, R; Casey, G; Moreno, V	Diez-Obrero, Virginia; Dampier, Christopher H.; Moratalla-Navarro, Ferran; Devall, Matthew; Plummer, Sarah J.; Diez-Villanueva, Anna; Peters, Ulrike; Bien, Stephanie; Huyghe, Jeroen R.; Kundaje, Anshul; Ibanez-Sanz, Gemma; Guino, Elisabeth; Obon-Santacana, Mireia; Carreras-Torres, Robert; Casey, Graham; Moreno, Victor	Genetic Effects on Transcriptome Profiles in Colon Epithelium Provide Functional Insights for Genetic Risk Loci	CELLULAR AND MOLECULAR GASTROENTEROLOGY AND HEPATOLOGY	2352-345X			2021	12	1		10.1016/j.jcmgh.2021.02.003	http://dx.doi.org/10.1016/j.jcmgh.2021.02.003	33601062	WOS:000680862600010	View Full Record in Web of Science
Scheller, J; Garbers, C; Rose-John, S	Scheller, Juergen; Garbers, Christoph; Rose-John, Stefan	Interleukin-6: From basic biology to selective blockade of pro-inflammatory activities	SEMINARS IN IMMUNOLOGY	1044-5323	1096-3618	FEB	2014	26	1		10.1016/j.smim.2013.11.002	http://dx.doi.org/10.1016/j.smim.2013.11.002	24325804	WOS:000333658600002	View Full Record in Web of Science
Lee, SR; Hwang, HJ; Yoon, JG; Bae, EY; Goo, KS; Cho, SJ; Cho, JA	Lee, So-Rok; Hwang, Hye-Jeong; Yoon, Ju-Gyeong; Bae, Eun-Young; Goo, Kyo-Suk; Cho, Sang-Joon; Cho, Jin Ah	Anti-inflammatory effect of Lycium barbarum on polarized human intestinal epithelial cells	NUTRITION RESEARCH AND PRACTICE	1976-1457	2005-6168	APR	2019	13	2		10.4162/nrp.2019.13.2.95	http://dx.doi.org/10.4162/nrp.2019.13.2.95	30984353	WOS:000464769600002	View Full Record in Web of Science
Hobbs, BD; Parker, MM; Chen, H; Lao, TT; Hardin, M; Qiao, DD; Hawrylkiewicz, I; Sliwinski, P; Yim, JJ; Kim, WJ; Kim, DK; Castaldi, PJ; Hersh, CP; Morrow, J; Celli, BR; Pinto-Plata, VM; Criner, GJ; Marchetti, N; Bueno, R; Agusti, A; Make, BJ; Crapo, JD; Calverley, PM; Donner, CF; Lomas, DA; Wouters, EFM; Vestbo, J; Pare, PD; Levy, RD; Rennard, SI; Zhou, XB; Laird, NM; Lin, XH; Beaty, TH; Silverman…	Hobbs, Brian D.; Parker, Margaret M.; Chen, Han; Lao, Taotao; Hardin, Megan; Qiao, Dandi; Hawrylkiewicz, Iwona; Sliwinski, Pawel; Yim, Jae-Joon; Kim, Woo Jin; Kim, Deog Kyeom; Castaldi, Peter J.; Hersh, Craig P.; Morrow, Jarrett; Celli, Bartolome R.; Pinto-Plata, Victor M.; Criner, Gerald J.; Marchetti, Nathaniel; Bueno, Raphael; Agusti, Alvar; Make, Barry J.; Crapo, James D.; Calverley, Peter M.…	Exome Array Analysis Identifies a Common Variant in IL27 Associated with Chronic Obstructive Pulmonary Disease	AMERICAN JOURNAL OF RESPIRATORY AND CRITICAL CARE MEDICINE	1073-449X	1535-4970	JUL 1	2016	194	1		10.1164/rccm.201510-2053OC	http://dx.doi.org/10.1164/rccm.201510-2053OC	26771213	WOS:000378979100012	View Full Record in Web of Science
Bussieres-Marmen, S; Hutchins, AP; Schirbel, A; Rebert, N; Tiganis, T; Fiocchi, C; Miranda-Saavedra, D; Tremblay, ML	Bussieres-Marmen, Stephanie; Hutchins, Andrew P.; Schirbel, Anja; Rebert, Nancy; Tiganis, Tony; Fiocchi, Claudio; Miranda-Saavedra, Diego; Tremblay, Michel L.	Characterization of PTPN2 and its use as a biomarker	METHODS	1046-2023	1095-9130	JAN 15	2014	65	2		10.1016/j.ymeth.2013.08.020	http://dx.doi.org/10.1016/j.ymeth.2013.08.020	23994241	WOS:000330748500011	View Full Record in Web of Science
Tsuru, A; Fujimoto, N; Takahashi, S; Saito, M; Nakamura, D; Iwano, M; Iwawaki, T; Kadokura, H; Ron, D; Kohno, K	Tsuru, Akio; Fujimoto, Naoko; Takahashi, Satsuki; Saito, Michiko; Nakamura, Daisuke; Iwano, Megumi; Iwawaki, Takao; Kadokura, Hiroshi; Ron, David; Kohno, Kenji	Negative feedback by IRE1 beta optimizes mucin production in goblet cells	PROCEEDINGS OF THE NATIONAL ACADEMY OF SCIENCES OF THE UNITED STATES OF AMERICA	0027-8424		FEB 19	2013	110	8		10.1073/pnas.1212484110	http://dx.doi.org/10.1073/pnas.1212484110	23386727	WOS:000315954400057	View Full Record in Web of Science
Khawar, MB; Abbasi, MH; Sheikh, N	Khawar, Muhammad Babar; Abbasi, Muddasir Hassan; Sheikh, Nadeem	IL-32: A Novel Pluripotent Inflammatory Interleukin, towards Gastric Inflammation, Gastric Cancer, and Chronic Rhino Sinusitis	MEDIATORS OF INFLAMMATION	0962-9351	1466-1861		2016	2016		8413768	10.1155/2016/8413768	http://dx.doi.org/10.1155/2016/8413768	27143819	WOS:000374424000001	View Full Record in Web of Science
Kotelevets, L; Walker, F; Mamadou, G; Lehy, T; Jordan, P; Chastre, E	Kotelevets, Larissa; Walker, Francine; Mamadou, Godefroy; Lehy, Therese; Jordan, Peter; Chastre, Eric	The Rac1 splice form Rac1b favors mouse colonic mucosa regeneration and contributes to intestinal cancer progression	ONCOGENE	0950-9232	1476-5594	NOV 15	2018	37	46		10.1038/s41388-018-0389-7	http://dx.doi.org/10.1038/s41388-018-0389-7	29985482	WOS:000450175900004	View Full Record in Web of Science
Grandi, A; Zini, I; Palese, S; Giorgio, C; Tognolini, M; Marchesani, F; Bruno, S; Flammini, L; Cantoni, AM; Castelli, R; Lodola, A; Fusari, A; Barocelli, E; Bertoni, S	Grandi, Andrea; Zini, Irene; Palese, Simone; Giorgio, Carmine; Tognolini, Massimiliano; Marchesani, Francesco; Bruno, Stefano; Flammini, Lisa; Cantoni, Anna Maria; Castelli, Riccardo; Lodola, Alessio; Fusari, Antonella; Barocelli, Elisabetta; Bertoni, Simona	Targeting the Eph/Ephrin System as Anti-Inflammatory Strategy in IBD	FRONTIERS IN PHARMACOLOGY	1663-9812		JUN 14	2019	10		691	10.3389/fphar.2019.00691	http://dx.doi.org/10.3389/fphar.2019.00691	31297055	WOS:000471885400001	View Full Record in Web of Science
Sveen, A; Bakken, AC; Agesen, TH; Lind, GE; Nesbakken, A; Nordgard, O; Brackmann, S; Rognum, TO; Lothe, RA; Skotheim, RI	Sveen, Anita; Bakken, Anne Cathrine; Agesen, Trude H.; Lind, Guro E.; Nesbakken, Arild; Nordgard, Oddmund; Brackmann, Stephan; Rognum, Torleiv O.; Lothe, Ragnhild A.; Skotheim, Rolf I.	The exon-level biomarker SLC39A14 has organ-confined cancer-specificity in colorectal cancer	INTERNATIONAL JOURNAL OF CANCER	0020-7136	1097-0215	SEP 15	2012	131	6		10.1002/ijc.27399	http://dx.doi.org/10.1002/ijc.27399	22173985	WOS:000306735700049	View Full Record in Web of Science
Shaghaghi, MA; Murphy, B; Eck, P	Shaghaghi, Mandana Amir; Murphy, Brent; Eck, Peter	The SLC2A14 gene: genomic locus, tissue expression, splice variants, and subcellular localization of the protein	BIOCHEMISTRY AND CELL BIOLOGY	0829-8211	1208-6002	AUG	2016	94	4		10.1139/bcb-2015-0089	http://dx.doi.org/10.1139/bcb-2015-0089	27460888	WOS:000381486800005	View Full Record in Web of Science
Brooke, MA; Longhurst, HJ; Plagnol, V; Kirkby, NS; Mitchell, JA; Ruschendorf, F; Warner, TD; Kelsell, DP; MacDonald, TT	Brooke, Matthew A.; Longhurst, Hilary J.; Plagnol, Vincent; Kirkby, Nicholas S.; Mitchell, Jane A.; Rueschendorf, Franz; Warner, Timothy D.; Kelsell, David P.; MacDonald, Thomas T.	Cryptogenic multifocal ulcerating stenosing enteritis associated with homozygous deletion mutations in cytosolic phospholipase A2-alpha	GUT	0017-5749	1468-3288	JAN	2014	63	1		10.1136/gutjnl-2012-303581	http://dx.doi.org/10.1136/gutjnl-2012-303581	23268370	WOS:000327835000011	View Full Record in Web of Science
Dornhoff, H; Becker, C; Wirtz, S; Strand, D; Tenzer, S; Rosfa, S; Neufert, C; Mudter, J; Markl, J; Siebler, J; Neurath, MF	Dornhoff, Heike; Becker, Christoph; Wirtz, Stefan; Strand, Dennis; Tenzer, Stefan; Rosfa, Susanne; Neufert, Clemens; Mudter, Jonas; Markl, Juergen; Siebler, Juergen; Neurath, Markus F.	A Variant of Smurf2 Protects Mice Against Colitis-Associated Colon Cancer by Inducing Transforming Growth Factor beta Signaling	GASTROENTEROLOGY	0016-5085		MAY	2012	142	5		10.1053/j.gastro.2012.02.005	http://dx.doi.org/10.1053/j.gastro.2012.02.005	22333948	WOS:000303113600037	View Full Record in Web of Science
Szappanos, A; Nagy, Z; Kovacs, B; Poor, G; Toth, M; Racz, K; Kiss, E; Patocs, A	Szappanos, A.; Nagy, Z.; Kovacs, B.; Poor, G.; Toth, M.; Racz, K.; Kiss, E.; Patocs, A.	Tissue-specific Glucocorticoid Signaling May Determine the Resistance Against Glucocorticoids in Autoimmune Diseases	CURRENT MEDICINAL CHEMISTRY	0929-8673	1875-533X		2015	22	9		10.2174/0929867321666141216125012	http://dx.doi.org/10.2174/0929867321666141216125012		WOS:000350477600004	View Full Record in Web of Science
Schumertl, T; Lokau, J; Rose-John, S; Garbers, C	Schumertl, Tim; Lokau, Juliane; Rose-John, Stefan; Garbers, Christoph	Function and proteolytic generation of the soluble interleukin-6 receptor in health and disease	BIOCHIMICA ET BIOPHYSICA ACTA-MOLECULAR CELL RESEARCH	0167-4889	1879-2596	JAN	2022	1869	1	119143	10.1016/j.bbamcr.2021.119143	http://dx.doi.org/10.1016/j.bbamcr.2021.119143	34626681	WOS:000710127600009	View Full Record in Web of Science
Woznicki, JA; Flood, P; Bustamante-Garrido, M; Stamou, P; Moloney, G; Fanning, A; Zulquernain, SA; McCarthy, J; Shanahan, F; Melgar, S; Nally, K	Woznicki, Jerzy A.; Flood, Peter; Bustamante-Garrido, Milan; Stamou, Panagiota; Moloney, Gerry; Fanning, Aine; Zulquernain, Syed Akbar; McCarthy, Jane; Shanahan, Fergus; Melgar, Silvia; Nally, Ken	Human BCL-G regulates secretion of inflammatory chemokines but is dispensable for induction of apoptosis by IFN-gamma and TNF-alpha in intestinal epithelial cells	CELL DEATH & DISEASE	2041-4889		JAN 27	2020	11	1		10.1038/s41419-020-2263-0	http://dx.doi.org/10.1038/s41419-020-2263-0	31988296	WOS:000511462900005	View Full Record in Web of Science
Facchinetti, MM	Facchinetti, Maria M.	Heme-Oxygenase-1	ANTIOXIDANTS & REDOX SIGNALING	1523-0864	1557-7716	JUN 10	2020	32	17		10.1089/ars.2020.8065	http://dx.doi.org/10.1089/ars.2020.8065	32148070	WOS:000530035100001	View Full Record in Web of Science
Menotta, M; Biagiotti, S; Spapperi, C; Orazi, S; Rossi, L; Chessa, L; Leuzzi, V; D'Agnano, D; Soresina, A; Micheli, R; Magnani, M	Menotta, Michele; Biagiotti, Sara; Spapperi, Chiara; Orazi, Sara; Rossi, Luigia; Chessa, Luciana; Leuzzi, Vincenzo; D'Agnano, Daniela; Soresina, Annarosa; Micheli, Roberto; Magnani, Mauro	ATM splicing variants as biomarkers for low dose dexamethasone treatment of A-T	ORPHANET JOURNAL OF RARE DISEASES	1750-1172		JUL 5	2017	12		126	10.1186/s13023-017-0669-2	http://dx.doi.org/10.1186/s13023-017-0669-2	28679388	WOS:000404714800001	View Full Record in Web of Science
Mandard, S; Patsouris, D	Mandard, Stephane; Patsouris, David	Nuclear Control of the Inflammatory Response in Mammals by Peroxisome Proliferator-Activated Receptors	PPAR RESEARCH	1687-4757	1687-4765		2013	2013		613864	10.1155/2013/613864	http://dx.doi.org/10.1155/2013/613864	23577023	WOS:000316905700001	View Full Record in Web of Science
Mager, LF; Koelzer, VH; Stuber, R; Thoo, L; Keller, I; Koeck, I; Langenegger, M; Simillion, C; Pfister, SP; Faderl, M; Genitsch, V; Tcymbarevich, I; Juillerat, P; Li, XH; Xia, Y; Karamitopoulou, E; Lyck, R; Zlobec, I; Hapfelmeier, S; Bruggmann, R; McCoy, KD; Macpherson, AJ; Muller, C; Beutler, B; Krebs, P	Mager, Lukas Franz; Koelzer, Viktor Hendrik; Stuber, Regula; Thoo, Lester; Keller, Irene; Koeck, Ivonne; Langenegger, Maya; Simillion, Cedric; Pfister, Simona P.; Faderl, Martin; Genitsch, Vera; Tcymbarevich, Irina; Juillerat, Pascal; Li, Xiaohong; Xia, Yu; Karamitopoulou, Eva; Lyck, Ruth; Zlobec, Inti; Hapfelmeier, Siegfried; Bruggmann, Remy; McCoy, Kathy D.; Macpherson, Andrew J.; Mueller, Chri…	The ESRP1-GPR137 axis contributes to intestinal pathogenesis	ELIFE	2050-084X		OCT 4	2017	6		e28366	10.7554/eLife.28366	http://dx.doi.org/10.7554/eLife.28366	28975893	WOS:000414136200001	View Full Record in Web of Science
Yuan, PQ; Wu, SV; Pothoulakis, C; Tache, Y	Yuan, Pu-Qing; Wu, S. Vincent; Pothoulakis, Charalabos; Tache, Yvette	Urocortins and CRF receptor type 2 variants in the male rat colon: gene expression and regulation by endotoxin and anti-inflammatory effect	AMERICAN JOURNAL OF PHYSIOLOGY-GASTROINTESTINAL AND LIVER PHYSIOLOGY	0193-1857	1522-1547	MAR 15	2016	310	6		10.1152/ajpgi.00337.2015	http://dx.doi.org/10.1152/ajpgi.00337.2015	26744472	WOS:000372348400007	View Full Record in Web of Science
Van Raemdonck, K; Van den Steen, PE; Liekens, S; Van Damme, J; Struyf, S	Van Raemdonck, Katrien; Van den Steen, Philippe E.; Liekens, Sandra; Van Damme, Jo; Struyf, Sofie	CXCR3 ligands in disease and therapy	CYTOKINE & GROWTH FACTOR REVIEWS	1359-6101	1879-0305	JUN	2015	26	3		10.1016/j.cytogfr.2014.11.009	http://dx.doi.org/10.1016/j.cytogfr.2014.11.009	25498524	WOS:000356209500004	View Full Record in Web of Science
Li, JH; Pan, XH; Ren, ZN; Li, BB; Liu, H; Wu, CF; Dong, XL; Vos, P; Pan, LL; Sun, J	Li, Jiahong; Pan, Xiaohua; Ren, Zhengnan; Li, Binbin; Liu, He; Wu, Chengfei; Dong, Xiaoliang; Vos, Paul; Pan, Li-Long; Sun, Jia	Protein arginine methyltransferase 2 (PRMT2) promotes dextran sulfate sodium-induced colitis by inhibiting the SOCS3 promoter via histone H3R8 asymmetric dimethylation	BRITISH JOURNAL OF PHARMACOLOGY	0007-1188	1476-5381	JAN	2022	179	1		10.1111/bph.15695	http://dx.doi.org/10.1111/bph.15695	34599829	WOS:000718940700001	View Full Record in Web of Science
Cheung, KL; Kim, C; Zhou, MM	Cheung, Ka Lung; Kim, Claudia; Zhou, Ming-Ming	The Functions of BET Proteins in Gene Transcription of Biology and Diseases	FRONTIERS IN MOLECULAR BIOSCIENCES		2296-889X	SEP 3	2021	8		728777	10.3389/fmolb.2021.728777	http://dx.doi.org/10.3389/fmolb.2021.728777	34540900	WOS:000697118900001	View Full Record in Web of Science
Graham, WV; He, WQ; Marchiando, AM; Zha, JM; Singh, G; Li, HS; Biswas, A; Ong, MLDM; Jiang, ZH; Choi, WS; Zuccola, H; Wang, YT; Griffith, J; Wu, JS; Rosenberg, HJ; Wang, YM; Snapper, SB; Ostrov, D; Meredith, SC; Miller, LW; Turner, JR	Graham, W. Vallen; He, Weiqi; Marchiando, Amanda M.; Zha, Juanmin; Singh, Gurminder; Li, Hua-Shan; Biswas, Amlan; Ong, Ma. Lora Drizella M.; Jiang, Zhi-Hui; Choi, Wangsun; Zuccola, Harmon; Wang, Yitang; Griffith, James; Wu, Jingshing; Rosenberg, Harry J.; Wang, Yingmin; Snapper, Scott B.; Ostrov, David; Meredith, Stephen C.; Miller, Lawrence W.; Turner, Jerrold R.	Intracellular MLCK1 diversion reverses barrier loss to restore mucosal homeostasis	NATURE MEDICINE	1078-8956	1546-170X	APR	2019	25	4		10.1038/s41591-019-0393-7	http://dx.doi.org/10.1038/s41591-019-0393-7	30936544	WOS:000463342800030	View Full Record in Web of Science
Janssens, R; Struyf, S; Proost, P	Janssens, Rik; Struyf, Sofie; Proost, Paul	Pathological roles of the homeostatic chemokine CXCL12	CYTOKINE & GROWTH FACTOR REVIEWS	1359-6101	1879-0305	DEC	2018	44			10.1016/j.cytogfr.2018.10.004	http://dx.doi.org/10.1016/j.cytogfr.2018.10.004	30396776	WOS:000453904500006	View Full Record in Web of Science
Grassel, S; Bauer, RJ	Graessel, Susanne; Bauer, Richard J.	Collagen XVI in health and disease	MATRIX BIOLOGY	0945-053X		MAR 11	2013	32	2		10.1016/j.matbio.2012.11.001	http://dx.doi.org/10.1016/j.matbio.2012.11.001	23149016	WOS:000318191600002	View Full Record in Web of Science
Wachs, AS; Bohne, J	Wachs, Amelie S.; Bohne, Jens	Two sides of the same medal: Noncoding mutations reveal new pathological mechanisms and insights into the regulation of gene expression	WILEY INTERDISCIPLINARY REVIEWS-RNA	1757-7004	1757-7012	JAN	2021	12	1	e1616	10.1002/wrna.1616	http://dx.doi.org/10.1002/wrna.1616	32633083	WOS:000545593300001	View Full Record in Web of Science
Lagou, V; Garcia-Perez, JE; Smets, I; Van Horebeek, L; Vandebergh, M; Chen, LY; Mallants, K; Prezzemolo, T; Hilven, K; Humblet-Baron, S; Moisse, M; Van Damme, P; Boeckxstaens, G; Bowness, P; Dubois, B; Dooley, J; Liston, A; Goris, A	Lagou, Vasiliki; Garcia-Perez, Josselyn E.; Smets, Ide; Van Horebeek, Lies; Vandebergh, Marijne; Chen, Liye; Mallants, Klara; Prezzemolo, Teresa; Hilven, Kelly; Humblet-Baron, Stephanie; Moisse, Matthieu; Van Damme, Philip; Boeckxstaens, Guy; Bowness, Paul; Dubois, Benedicte; Dooley, James; Liston, Adrian; Goris, An	Genetic Architecture of Adaptive Immune System Identifies Key Immune Regulators	CELL REPORTS	2211-1247		OCT 16	2018	25	3		10.1016/j.celrep.2018.09.048	http://dx.doi.org/10.1016/j.celrep.2018.09.048	30332657	WOS:000448217500023	View Full Record in Web of Science
Hebbar, S; Lehmann, M	Hebbar, Sarita; Lehmann, Malte	First person - Sarita Hebbar and Malte Lehmann	BIOLOGY OPEN	2046-6390		JAN	2021	10	1	bio058519	10.1242/bio.058519	http://dx.doi.org/10.1242/bio.058519		WOS:000623046100011	View Full Record in Web of Science
Liu, ZL; Ran, Y; Tao, CY; Li, SC; Chen, J; Yang, EC	Liu, Zelin; Ran, Yuan; Tao, Changyu; Li, Sichen; Chen, Jian; Yang, Ence	Detection of circular RNA expression and related quantitative trait loci in the human dorsolateral prefrontal cortex	GENOME BIOLOGY	1474-760X		MAY 20	2019	20		99	10.1186/s13059-019-1701-8	http://dx.doi.org/10.1186/s13059-019-1701-8	31109370	WOS:000468488100001	View Full Record in Web of Science
Ye, CJ; Chen, J; Villani, AC; Gate, RE; Subramaniam, M; Bhangale, T; Lee, MN; Raj, T; Raychowdhury, R; Li, WB; Rogel, N; Simmons, S; Imboywa, SH; Chipendo, PI; McCabe, C; Lee, MH; Frohlich, IY; Stranger, BE; De Jager, PL; Regev, A; Behrens, T; Hacohen, N	Ye, Chun Jimmie; Chen, Jenny; Villani, Alexandra-Chloe; Gate, Rachel E.; Subramaniam, Meena; Bhangale, Tushar; Lee, Mark N.; Raj, Towfique; Raychowdhury, Raktima; Li, Weibo; Rogel, Noga; Simmons, Sean; Imboywa, Selina H.; Chipendo, Portia I.; McCabe, Cristin; Lee, Michelle H.; Frohlich, Irene Y.; Stranger, Barbara E.; De Jager, Philip L.; Regev, Aviv; Behrens, Tim; Hacohen, Nir	Genetic analysis of isoform usage in the human anti-viral response reveals influenza-specific regulation of ERAP2 transcripts under balancing selection	GENOME RESEARCH	1088-9051	1549-5469	DEC	2018	28	12		10.1101/gr.240390.118	http://dx.doi.org/10.1101/gr.240390.118	30446528	WOS:000451913800005	View Full Record in Web of Science
Cao, YY; Wang, ZH; Yan, YQ; Ji, LH; He, J; Xuan, BQ; Shen, CQ; Ma, YR; Jiang, SS; Ma, D; Tong, TY; Zhang, XY; Gao, ZY; Zhu, XQ; Fang, JY; Chen, HY; Hong, J	Cao, Yingying; Wang, Zhenhua; Yan, Yuqing; Ji, Linhua; He, Jie; Xuan, Baoqin; Shen, Chaoqin; Ma, Yanru; Jiang, Shanshan; Ma, Dan; Tong, Tianying; Zhang, Xinyu; Gao, Ziyun; Zhu, Xiaoqiang; Fang, Jing-Yuan; Chen, Haoyan; Hong, Jie	Enterotoxigenic Bacteroides fragilis Promotes Intestinal Inflammation and Malignancy by Inhibiting Exosome-Packaged miR-149-3p	GASTROENTEROLOGY	0016-5085	1528-0012	NOV	2021	161	5		10.1053/j.gastro.2021.08.003	http://dx.doi.org/10.1053/j.gastro.2021.08.003	34371001	WOS:000750577700028	View Full Record in Web of Science
Umeno, J; Hisamatsu, T; Esaki, M; Hirano, A; Kubokura, N; Asano, K; Kochi, S; Yanai, S; Fuyuno, Y; Shimamura, K; Hosoe, N; Ogata, H; Watanabe, T; Aoyagi, K; Ooi, H; Watanabe, K; Yasukawa, S; Hirai, F; Matsui, T; Iida, M; Yao, T; Hibi, T; Kosaki, K; Kanai, T; Kitazono, T; Matsumoto, T	Umeno, Junji; Hisamatsu, Tadakazu; Esaki, Motohiro; Hirano, Atsushi; Kubokura, Naoya; Asano, Kouichi; Kochi, Shuji; Yanai, Shunichi; Fuyuno, Yuta; Shimamura, Katsuyoshi; Hosoe, Naoki; Ogata, Haruhiko; Watanabe, Takashi; Aoyagi, Kunihiko; Ooi, Hidehisa; Watanabe, Kenji; Yasukawa, Shigeyoshi; Hirai, Fumihito; Matsui, Toshiyuki; Iida, Mitsuo; Yao, Tsuneyoshi; Hibi, Toshifumi; Kosaki, Kenjiro; Kanai,…	A Hereditary Enteropathy Caused by Mutations in the SLCO2A1 Gene, Encoding a Prostaglandin Transporter	PLOS GENETICS	1553-7404		NOV	2015	11	11	e1005581	10.1371/journal.pgen.1005581	http://dx.doi.org/10.1371/journal.pgen.1005581	26539716	WOS:000366179000009	View Full Record in Web of Science
Finger, JN; Lich, JD; Dare, LC; Cook, MN; Brown, KK; Duraiswami, C; Bertin, JJ; Gough, PJ	Finger, Joshua N.; Lich, John D.; Dare, Lauren C.; Cook, Michael N.; Brown, Kristin K.; Duraiswami, Chaya; Bertin, John J.; Gough, Peter J.	Autolytic Proteolysis within the Function to Find Domain (FIIND) Is Required for NLRP1 Inflammasome Activity	JOURNAL OF BIOLOGICAL CHEMISTRY		1083-351X	JUL 20	2012	287	30		10.1074/jbc.M112.378323	http://dx.doi.org/10.1074/jbc.M112.378323	22665479	WOS:000306651700016	View Full Record in Web of Science
Van Esch, H; Colnaghi, R; Freson, K; Starokadomskyy, P; Zankl, A; Backx, L; Abramowicz, I; Outwin, E; Rohena, L; Faulkner, C; Leong, GM; Newbury-Ecob, RA; Challis, RC; Ounap, K; Jaeken, J; Seuntjens, E; Devriendt, K; Burstein, E; Low, KJ; O'Driscoll, M	Van Esch, Hilde; Colnaghi, Rita; Freson, Kathleen; Starokadomskyy, Petro; Zankl, Andreas; Backx, Liesbeth; Abramowicz, Iga; Outwin, Emily; Rohena, Luis; Faulkner, Claire; Leong, Gary M.; Newbury-Ecob, Ruth A.; Challis, Rachel C.; Ounap, Katrin; Jaeken, Jacques; Seuntjens, Eve; Devriendt, Koen; Burstein, Ezra; Low, Karen J.; O'Driscoll, Mark	Defective DNA Polymerase alpha-Primase Leads to X-Linked Intellectual Disability Associated with Severe Growth Retardation, Microcephaly, and Hypogonadism	AMERICAN JOURNAL OF HUMAN GENETICS	0002-9297	1537-6605	MAY 2	2019	104	5		10.1016/j.ajhg.2019.03.006	http://dx.doi.org/10.1016/j.ajhg.2019.03.006	31006512	WOS:000466608700014	View Full Record in Web of Science
Thoo, L; Noti, M; Krebs, P	Thoo, Lester; Noti, Mario; Krebs, Philippe	Keep calm: the intestinal barrier at the interface of peace and war	CELL DEATH & DISEASE	2041-4889		NOV 7	2019	10		849	10.1038/s41419-019-2086-z	http://dx.doi.org/10.1038/s41419-019-2086-z	31699962	WOS:000497970900006	View Full Record in Web of Science
Rhee, SH; Ma, EL; Lee, Y; Tache, Y; Pothoulakis, C; Im, E	Rhee, Sang Hoon; Ma, Elise L.; Lee, Yunna; Tache, Yvette; Pothoulakis, Charalabos; Im, Eunok	Corticotropin Releasing Hormone and Urocortin 3 Stimulate Vascular Endothelial Growth Factor Expression through the cAMP/CREB Pathway	JOURNAL OF BIOLOGICAL CHEMISTRY		1083-351X	OCT 23	2015	290	43		10.1074/jbc.M115.678979	http://dx.doi.org/10.1074/jbc.M115.678979	26350463	WOS:000363527300037	View Full Record in Web of Science
Janecke, AR; Heinz-Erian, P; Yin, JY; Petersen, BS; Franke, A; Lechner, S; Fuchs, I; Melancon, S; Uhlig, HH; Travis, S; Marinier, E; Perisic, V; Ristic, N; Gerner, P; Booth, IW; Wedenoja, S; Baumgartner, N; Vodopiutz, J; Frechette-Duval, MC; De Lafollie, J; Persad, R; Warner, N; Tse, CM; Sud, K; Zachos, NC; Sarker, R; Zhu, XJ; Muise, AM; Zimmer, KP; Witt, H; Zoller, H; Donowitz, M; Muller, T	Janecke, Andreas R.; Heinz-Erian, Peter; Yin, Jianyi; Petersen, Britt-Sabina; Franke, Andre; Lechner, Silvia; Fuchs, Irene; Melancon, Serge; Uhlig, Holmh H.; Travis, Simon; Marinier, Evelyne; Perisic, Vojislav; Ristic, Nina; Gerner, Patrick; Booth, Ian W.; Wedenoja, Satu; Baumgartner, Nadja; Vodopiutz, Julia; Frechette-Duval, Marie-Christine; De Lafollie, Jan; Persad, Rabindranath; Warner, Neil; …	Reduced sodium/proton exchanger NHE3 activity causes congenital sodium diarrhea	HUMAN MOLECULAR GENETICS	0964-6906	1460-2083	DEC 1	2015	24	23		10.1093/hmg/ddv367	http://dx.doi.org/10.1093/hmg/ddv367	26358773	WOS:000368371600005	View Full Record in Web of Science
Huang, YL; Feng, YH; Wang, Y; Wang, P; Wang, FJ; Ren, H	Huang, Yalan; Feng, Yanhai; Wang, Yu; Wang, Pei; Wang, Fengjun; Ren, Hui	Severe Burn-Induced Intestinal Epithelial Barrier Dysfunction Is Associated With Endoplasmic Reticulum Stress and Autophagy in Mice	FRONTIERS IN PHYSIOLOGY	1664-042X		APR 23	2018	9		441	10.3389/fphys.2018.00441	http://dx.doi.org/10.3389/fphys.2018.00441	29740349	WOS:000430579400001	View Full Record in Web of Science
Madkaikar, M; Italia, K; Gupta, M; Desai, M; Aggarwal, A; Singh, S; Suri, D; Mishra, A; Chavan, S; Ghosh, K; Sarangal, R; Dogra, S	Madkaikar, Manisha; Italia, Khushnooma; Gupta, Maya; Desai, Mukesh; Aggarwal, Amita; Singh, Surjit; Suri, Deepti; Mishra, Anju; Chavan, Sushant; Ghosh, Kanjaksha; Sarangal, Rishu; Dogra, Sunil	Leukocyte Adhesion Deficiency-I with a Novel Intronic Mutation Presenting with Pyoderma Gangrenosum- Like Lesions	JOURNAL OF CLINICAL IMMUNOLOGY	0271-9142	1573-2592	MAY	2015	35	4		10.1007/s10875-015-0155-3	http://dx.doi.org/10.1007/s10875-015-0155-3	25876705	WOS:000354823700014	View Full Record in Web of Science
Matesanz, F; Potenciano, V; Fedetz, M; Ramos-Mozo, P; Abad-Grau, MD; Karaky, M; Barrionuevo, C; Izquierdo, G; Ruiz-Pena, JL; Garcia-Sanchez, MI; Lucas, M; Fernandez, O; Leyva, L; Otaegui, D; Munoz-Culla, M; Olascoaga, J; Vandenbroeck, K; Alloza, I; Astobiza, I; Antiguedad, A; Villar, LM; Alvarez-Cermeno, JC; Malhotra, S; Comabella, M; Montalban, X; Saiz, A; Blanco, Y; Arroyo, R; Varade, J; Urcela…	Matesanz, Fuencisla; Potenciano, Victor; Fedetz, Maria; Ramos-Mozo, Priscila; del Mar Abad-Grau, Maria; Karaky, Mohamad; Barrionuevo, Cristina; Izquierdo, Guillermo; Luis Ruiz-Pena, Juan; Isabel Garcia-Sanchez, Maria; Lucas, Miguel; Fernandez, Oscar; Leyva, Laura; Otaegui, David; Munoz-Culla, Maider; Olascoaga, Javier; Vandenbroeck, Koen; Alloza, Iraide; Astobiza, Ianire; Antigueedad, Alfredo; Ma…	A functional variant that affects exon-skipping and protein expression of SP140 as genetic mechanism predisposing to multiple sclerosis	HUMAN MOLECULAR GENETICS	0964-6906	1460-2083	OCT 1	2015	24	19		10.1093/hmg/ddv256	http://dx.doi.org/10.1093/hmg/ddv256	26152201	WOS:000363018100019	View Full Record in Web of Science
Gudino, V; Cammareri, P; Billard, CV; Myant, KB	Gudino, Victoria; Cammareri, Patrizia; Billard, Caroline, V; Myant, Kevin B.	Negative regulation of TGF beta-induced apoptosis by RAC1B enhances intestinal tumourigenesis	CELL DEATH & DISEASE	2041-4889		SEP 25	2021	12	10	873	10.1038/s41419-021-04177-7	http://dx.doi.org/10.1038/s41419-021-04177-7	34564693	WOS:000699036200001	View Full Record in Web of Science
Lee, WI; Fan, WL; Lu, CH; Chen, SH; Kuo, ML; Lin, SJ; Tsai, WS; Jaing, TH; Chen, LC; Yeh, KW; Yao, TC; Huang, JL	Lee, Wen-I; Fan, Wen-Lang; Lu, Chun-Hao; Chen, Shih-Hsiang; Kuo, Ming-Ling; Lin, Syh-Jae; Tsai, Weng-Sheng; Jaing, Tang-Her; Chen, Li-Chen; Yeh, Kuo-Wei; Yao, Tsung-Chieh; Huang, Jing-Long	A Novel CD3G Mutation in a Taiwanese Patient With Normal T Regulatory Function Presenting With the CVID Phenotype Free of Autoimmunity-Analysis of all Genotypes and Phenotypes	FRONTIERS IN IMMUNOLOGY	1664-3224		DEC 19	2019	10		2833	10.3389/fimmu.2019.02833	http://dx.doi.org/10.3389/fimmu.2019.02833	31921117	WOS:000505176600001	View Full Record in Web of Science
Zhang, ZB; Ciccia, F; Zeng, FX; Guggino, G; Yee, K; Abdullah, H; Silverberg, MS; Alessandro, R; Triolo, G; Haroon, N	Zhang, Zhenbo; Ciccia, Francesco; Zeng, Fanxing; Guggino, Giuliana; Yee, Kirby; Abdullah, Hasan; Silverberg, Mark S.; Alessandro, Riccardo; Triolo, Giovanni; Haroon, Nigil	Functional Interaction of Endoplasmic Reticulum Aminopeptidase 2 and HLA-B27 Activates the Unfolded Protein Response	ARTHRITIS & RHEUMATOLOGY	2326-5191	2326-5205	MAY	2017	69	5		10.1002/art.40033	http://dx.doi.org/10.1002/art.40033	28029742	WOS:000400068300015	View Full Record in Web of Science
Li, Y; Chu, HX; Zhao, MS; Li, CZ; Guan, YT; Guo, C; Li, Y; Wang, Q; Shi, YY; Zhu, FL; Zhang, LN	Li, Yuan; Chu, Hongxia; Zhao, Mingsheng; Li, Chaoze; Guan, Yetong; Guo, Chun; Li, Yan; Wang, Qun; Shi, Yongyu; Zhu, Faliang; Zhang, Lining	IL-37d Negatively Regulates NLRP3 Transcription via Receptor-mediated Pathway and Alleviates DSS-induced Colitis	INFLAMMATORY BOWEL DISEASES	1078-0998	1536-4844	JAN	2021	27	1		10.1093/ibd/izaa124	http://dx.doi.org/10.1093/ibd/izaa124	32582954	WOS:000606702800016	View Full Record in Web of Science
Timberlake, M; Prall, K; Roy, B; Dwivedi, Y	Timberlake, Matthew, II; Prall, Kevin; Roy, Bhaskar; Dwivedi, Yogesh	Unfolded protein response and associated alterations in toll-like receptor expression and interaction in the hippocampus of restraint rats	PSYCHONEUROENDOCRINOLOGY	0306-4530		MAR	2018	89			10.1016/j.psyneuen.2018.01.017	http://dx.doi.org/10.1016/j.psyneuen.2018.01.017	29414031	WOS:000430625700024	View Full Record in Web of Science
Yang, W; Lee, PPW; Thong, MK; Ramanujam, TM; Shanmugam, A; Koh, MT; Chan, KW; Ying, D; Wang, Y; Shen, JJ; Yang, J; Lau, YL	Yang, W.; Lee, P. P. W.; Thong, M. -K.; Ramanujam, T. M.; Shanmugam, A.; Koh, M. -T.; Chan, K. -W.; Ying, D.; Wang, Y.; Shen, J. J.; Yang, J.; Lau, Y. L.	Compound heterozygous mutations in TTC7A cause familial multiple intestinal atresias and severe combined immunodeficiency	CLINICAL GENETICS	0009-9163	1399-0004	DEC	2015	88	6		10.1111/cge.12553	http://dx.doi.org/10.1111/cge.12553	25534311	WOS:000364637900008	View Full Record in Web of Science
Crespo, I; San-Miguel, B; Prause, C; Marroni, N; Cuevas, MJ; Gonzalez-Gallego, J; Tunon, MJ	Crespo, Irene; San-Miguel, Beatriz; Prause, Carolina; Marroni, Norma; Cuevas, Maria J.; Gonzalez-Gallego, Javier; Tunon, Maria J.	Glutamine Treatment Attenuates Endoplasmic Reticulum Stress and Apoptosis in TNBS-Induced Colitis	PLOS ONE	1932-6203		NOV 28	2012	7	11	e50407	10.1371/journal.pone.0050407	http://dx.doi.org/10.1371/journal.pone.0050407	23209735	WOS:000312601700067	View Full Record in Web of Science
Spagnolo, P; Grunewald, J	Spagnolo, Paolo; Grunewald, Johan	Recent advances in the genetics of sarcoidosis	JOURNAL OF MEDICAL GENETICS	0022-2593		MAY	2013	50	5		10.1136/jmedgenet-2013-101532	http://dx.doi.org/10.1136/jmedgenet-2013-101532	23526832	WOS:000317563800003	View Full Record in Web of Science
Lu, P; Struijs, MC; Mei, JP; Witte-Bouma, J; Korteland-van Male, AM; de Bruijn, ACJM; van Goudoever, JB; Renes, IB	Lu, Peng; Struijs, Marie-Chantal; Mei, Jiaping; Witte-Bouma, Janneke; Korteland-van Male, Anita M.; de Bruijn, Adrianus C. J. M.; van Goudoever, Johannes B.; Renes, Ingrid B.	Endoplasmic Reticulum Stress, Unfolded Protein Response and Altered T Cell Differentiation in Necrotizing Enterocolitis	PLOS ONE	1932-6203		OCT 23	2013	8	10	e78491	10.1371/journal.pone.0078491	http://dx.doi.org/10.1371/journal.pone.0078491	24194940	WOS:000326037000119	View Full Record in Web of Science
Wang, Y; Yao, WR; Duan, JZ; Xu, W; Yang, GB	Wang, Yue; Yao, Wen-Rong; Duan, Jia-Zhong; Xu, Wei; Yang, Gui-Bo	Mucosal Addressin Cell Adhesion Molecule-1 of Rhesus Macaques: Molecular Cloning, Expression, and Alteration After Viral Infection	DIGESTIVE DISEASES AND SCIENCES	0163-2116	1573-2568	OCT	2014	59	10		10.1007/s10620-014-3209-0	http://dx.doi.org/10.1007/s10620-014-3209-0	24828920	WOS:000342148900012	View Full Record in Web of Science
Heeren, JJFV	Heeren, Julian J. Freen-van	Post-transcriptional control of T-cell cytokine production: Implications for cancer therapy	IMMUNOLOGY	0019-2805	1365-2567	SEP	2021	164	1		10.1111/imm.13339	http://dx.doi.org/10.1111/imm.13339	33884612	WOS:000648738300001	View Full Record in Web of Science
Choi, S; Snider, JM; Olakkengil, N; Lambert, JM; Anderson, AK; Ross-Evans, JS; Cowart, LA; Snider, AJ	Choi, Songhwa; Snider, Justin M.; Olakkengil, Nicole; Lambert, Johana M.; Anderson, Andrea K.; Ross-Evans, Jessica S.; Cowart, L. Ashley; Snider, Ashley J.	Myristate-induced endoplasmic reticulum stress requires ceramide synthases 5/6 and generation of C14-ceramide in intestinal epithelial cells	FASEB JOURNAL	0892-6638	1530-6860	OCT	2018	32	10		10.1096/fj.201800141R	http://dx.doi.org/10.1096/fj.201800141R	29768040	WOS:000447972500043	View Full Record in Web of Science
Chansavang, A; Maalej, S; Narjoz, C; Loriot, MA; Pallet, N	Chansavang, Albain; Maalej, Sadok; Narjoz, Celine; Loriot, Marie-Anne; Pallet, Nicolas	Identification of rare defective allelic variants in cases of thiopurine S-methyltransferase deficient activity	PHARMACOGENOMICS	1462-2416	1744-8042	NOV	2020	21	17		10.2217/pgs-2020-0124	http://dx.doi.org/10.2217/pgs-2020-0124	33118454	WOS:000583033500001	View Full Record in Web of Science
Fischer, A; Grunewald, J; Spagnolo, P; Nebel, A; Schreiber, S; Muller-Quernheim, J	Fischer, Annegret; Grunewald, Johan; Spagnolo, Paolo; Nebel, Almut; Schreiber, Stefan; Mueller-Quernheim, Joachim	Genetics of Sarcoidosis	SEMINARS IN RESPIRATORY AND CRITICAL CARE MEDICINE	1069-3424	1098-9048	JUN	2014	35	3		10.1055/s-0034-1376860	http://dx.doi.org/10.1055/s-0034-1376860	25007082	WOS:000336828400003	View Full Record in Web of Science
Meunier, C; Van der Kraak, L; Turbide, C; Groulx, N; Labouba, I; Cingolani, P; Blanchette, M; Yeretssian, G; Mes-Masson, AM; Saleh, M; Beauchemin, N; Gros, P	Meunier, Charles; Van der Kraak, Lauren; Turbide, Claire; Groulx, Normand; Labouba, Ingrid; Cingolani, Pablo; Blanchette, Mathieu; Yeretssian, Garabet; Mes-Masson, Anne-Marie; Saleh, Maya; Beauchemin, Nicole; Gros, Philippe	Positional Mapping and Candidate Gene Analysis of the Mouse Ccs3 Locus That Regulates Differential Susceptibility to Carcinogen-Induced Colorectal Cancer	PLOS ONE	1932-6203		MAR 14	2013	8	3	e58733	10.1371/journal.pone.0058733	http://dx.doi.org/10.1371/journal.pone.0058733	23516545	WOS:000316407400057	View Full Record in Web of Science
Gudino, V; Pohl, SOG; Billard, CV; Cammareri, P; Bolado, A; Aitken, S; Stevenson, D; Hall, AE; Agostino, M; Cassidy, J; Nixon, C; von Kriegsheim, A; Freile, P; Popplewell, L; Dickson, G; Murphy, L; Wheeler, A; Dunlop, M; Din, F; Strathdee, D; Sansom, OJ; Myant, KB	Gudino, Victoria; Pohl, Sebastian Other-Gee; Billard, Caroline V.; Cammareri, Patrizia; Bolado, Alfonso; Aitken, Stuart; Stevenson, David; Hall, Adam E.; Agostino, Mark; Cassidy, John; Nixon, Colin; von Kriegsheim, Alex; Freile, Paz; Popplewell, Linda; Dickson, George; Murphy, Laura; Wheeler, Ann; Dunlop, Malcolm; Din, Farhat; Strathdee, Douglas; Sansom, Owen J.; Myant, Kevin B.	RAC1B modulates intestinal tumourigenesis via modulation of WNT and EGFR signalling pathways	NATURE COMMUNICATIONS		2041-1723	APR 20	2021	12	1	2335	10.1038/s41467-021-22531-3	http://dx.doi.org/10.1038/s41467-021-22531-3	33879799	WOS:000642509600004	View Full Record in Web of Science
Chai, SC; Cherian, MT; Wang, YM; Chen, TS	Chai, Sergio C.; Cherian, Milu T.; Wang, Yue-Ming; Chen, Taosheng	Small-molecule modulators of PXR and CAR	BIOCHIMICA ET BIOPHYSICA ACTA-GENE REGULATORY MECHANISMS	1874-9399	0006-3002	SEP	2016	1859	9		10.1016/j.bbagrm.2016.02.013	http://dx.doi.org/10.1016/j.bbagrm.2016.02.013	26921498	WOS:000381952100008	View Full Record in Web of Science
Abeler-Dorner, L; Swamy, M; Williams, G; Hayday, AC; Bas, A	Abeler-Doerner, Lucie; Swamy, Mahima; Williams, Gareth; Hayday, Adrian C.; Bas, Anna	Butyrophilins: an emerging family of immune regulators	TRENDS IN IMMUNOLOGY	1471-4906		JAN	2012	33	1		10.1016/j.it.2011.09.007	http://dx.doi.org/10.1016/j.it.2011.09.007	22030238	WOS:000299713800005	View Full Record in Web of Science
Tong, X; Ma, Y; Niu, XD; Yan, ZP; Liu, ST; Peng, B; Peng, SF; Fan, H	Tong, Xiang; Ma, Yao; Niu, Xundong; Yan, Zhipeng; Liu, Sitong; Peng, Bo; Peng, Shifeng; Fan, Hong	The BTNL2 G16071A gene polymorphism increases granulomatous disease susceptibility A meta-analysis including FPRP test of 8710 participants	MEDICINE	0025-7974	1536-5964	JUL	2016	95	30	e4325	10.1097/MD.0000000000004325	http://dx.doi.org/10.1097/MD.0000000000004325	27472712	WOS:000380768900049	View Full Record in Web of Science
